# Supplementary material for: Synthesis and studies on forward and reverse reactions of phenol-blocked polyisocyanates: an insight into blocked isocyanates
Source: Royal Society of Chemistry journal article supplement (doi:10.1039/c6ra15643f), 2016-01-01
Supplement: c6ra15643f1.pdf [file c6ra15643f1.pdf]

## SUPPORTING INFORMATION

### **Synthesis and studies on forward and reverse reactions of phenol-blocked polyisocyanates: An insight into blocked isocyanates**

A. Sultan Nasar\* and S. Kalaimani

Department of Polymer Science, University of Madras, Guindy Campus, Chennai-600025, India.

E-mail: [drasultannasar@yahoo.com](mailto:drasultannasar@yahoo.com); [drasultannasar@unom.ac.in](mailto:drasultannasar@unom.ac.in); Tel: +044-22202820

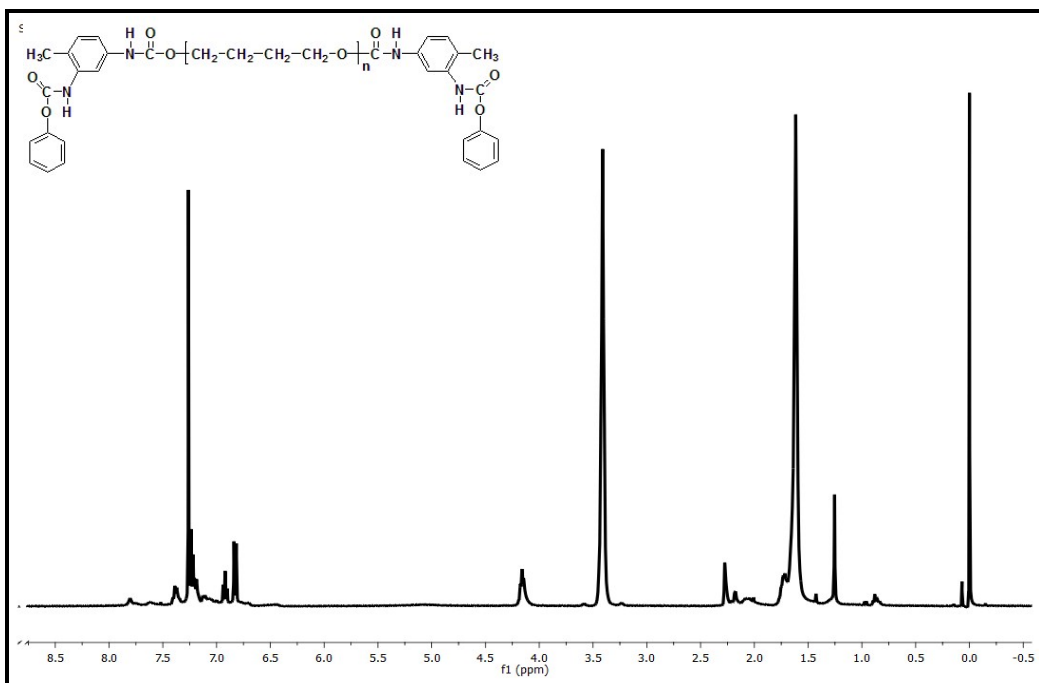

**Figure S1.** <sup>1</sup>H-NMR spectrum of phenol-blocked polyisocyanate (Solvent:CDCl<sub>3</sub>).

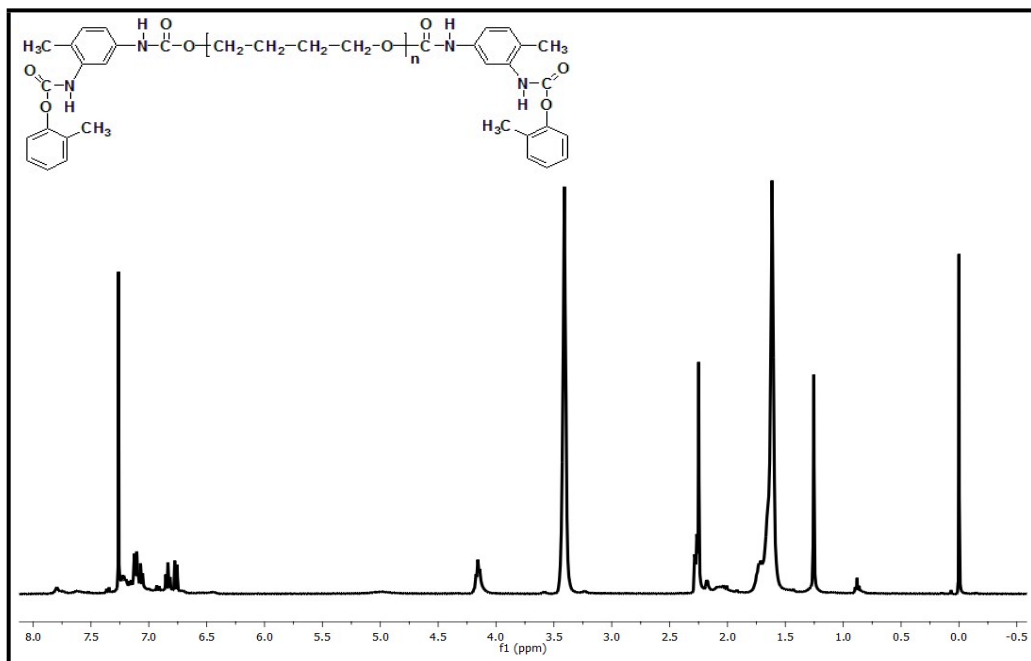

**Figure S2.** <sup>1</sup>H-NMR spectrum of o-cresol-blocked polyisocyanate (Solvent:CDCl<sub>3</sub>).

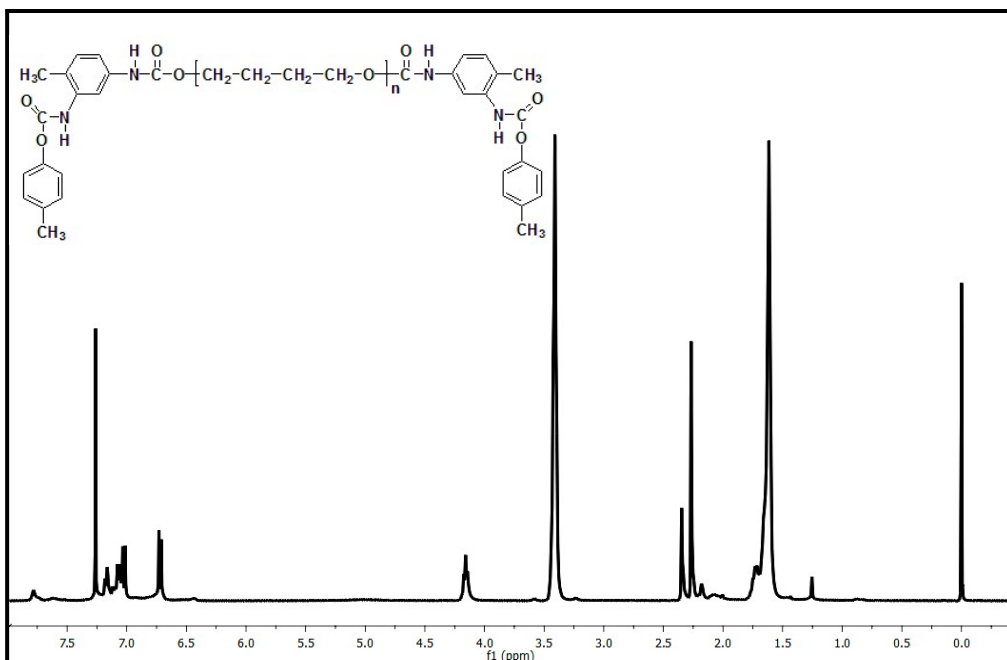

**Figure S3.** <sup>1</sup>H-NMR spectrum of p-cresol-blocked polyisocyanate (Solvent:CDCl<sub>3</sub>).

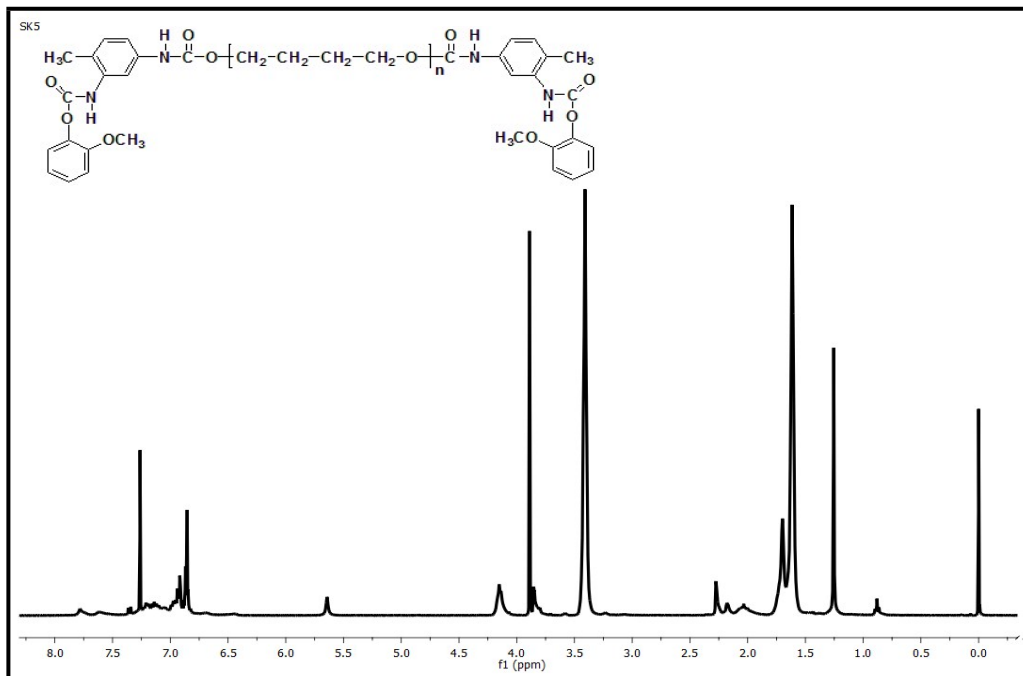

**Figure S4.** <sup>1</sup>H-NMR spectrum of o-methoxyphenol-blocked polyisocyanate (Solvent:CDCl<sub>3</sub>).

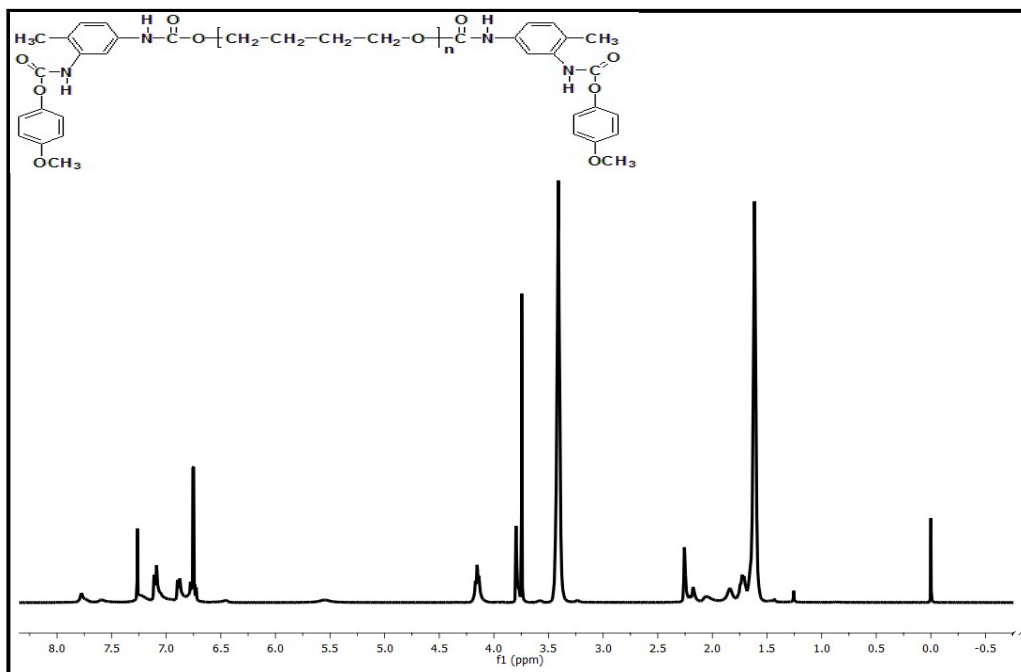

**Figure S5.** <sup>1</sup>H-NMR spectrum of p-methoxyphenol-blocked polyisocyanate (Solvent:CDCl<sub>3</sub>).

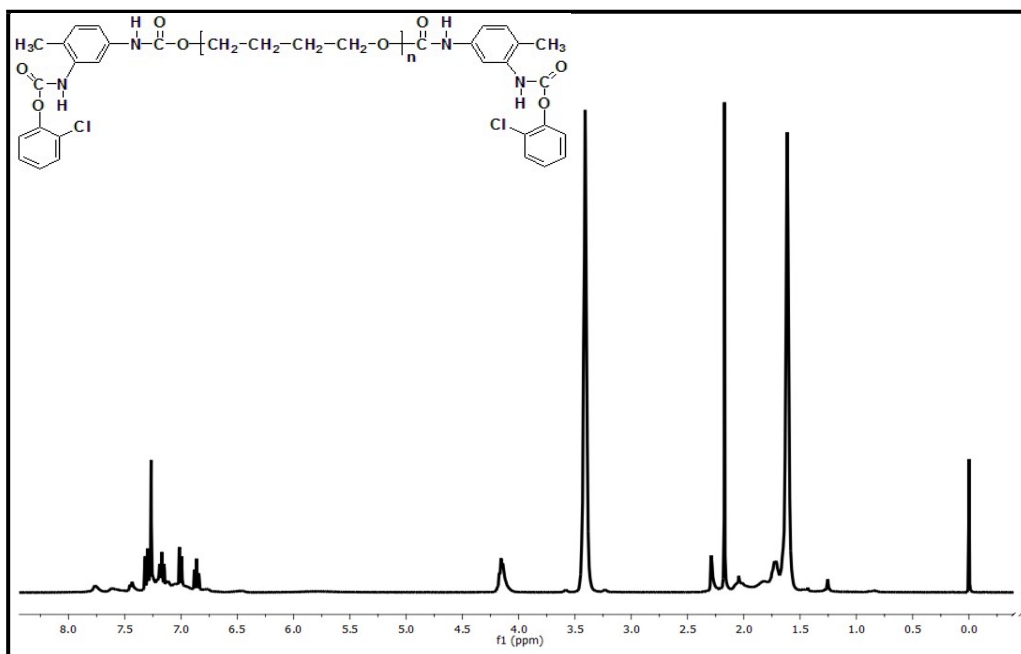

**Figure S6.** <sup>1</sup>H-NMR spectrum of o-chlorophenol-blocked polyisocyanate (Solvent:CDCl<sub>3</sub>).



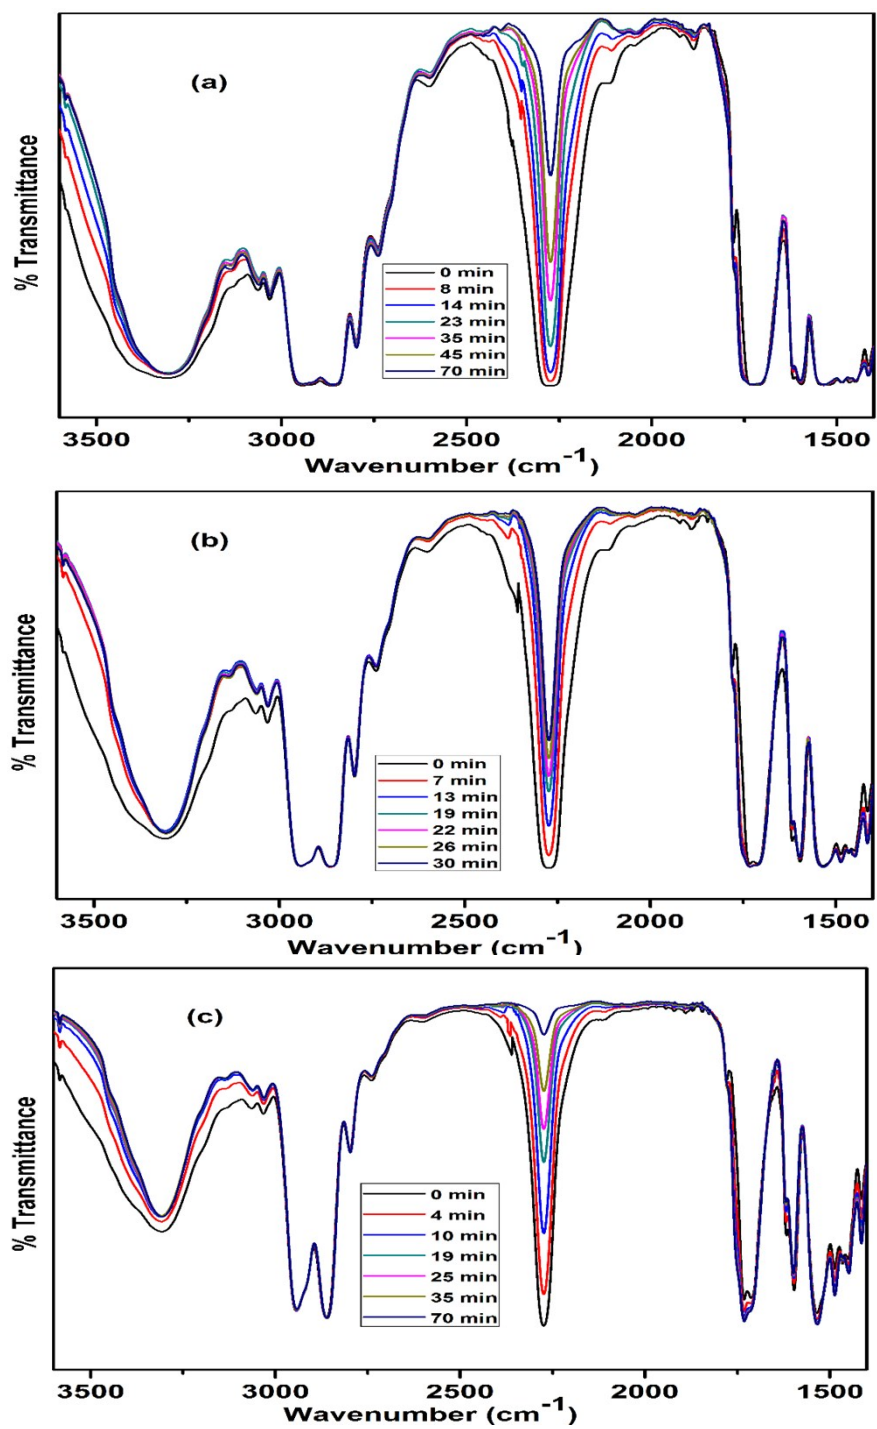

**Figure S9.** FT-IR Spectra recorded for different time intervals at different temperatures for the blocking reaction of polyisocyanate with o-cresol; (a) 40 °C (b) 50 °C and (c) 60 °C.

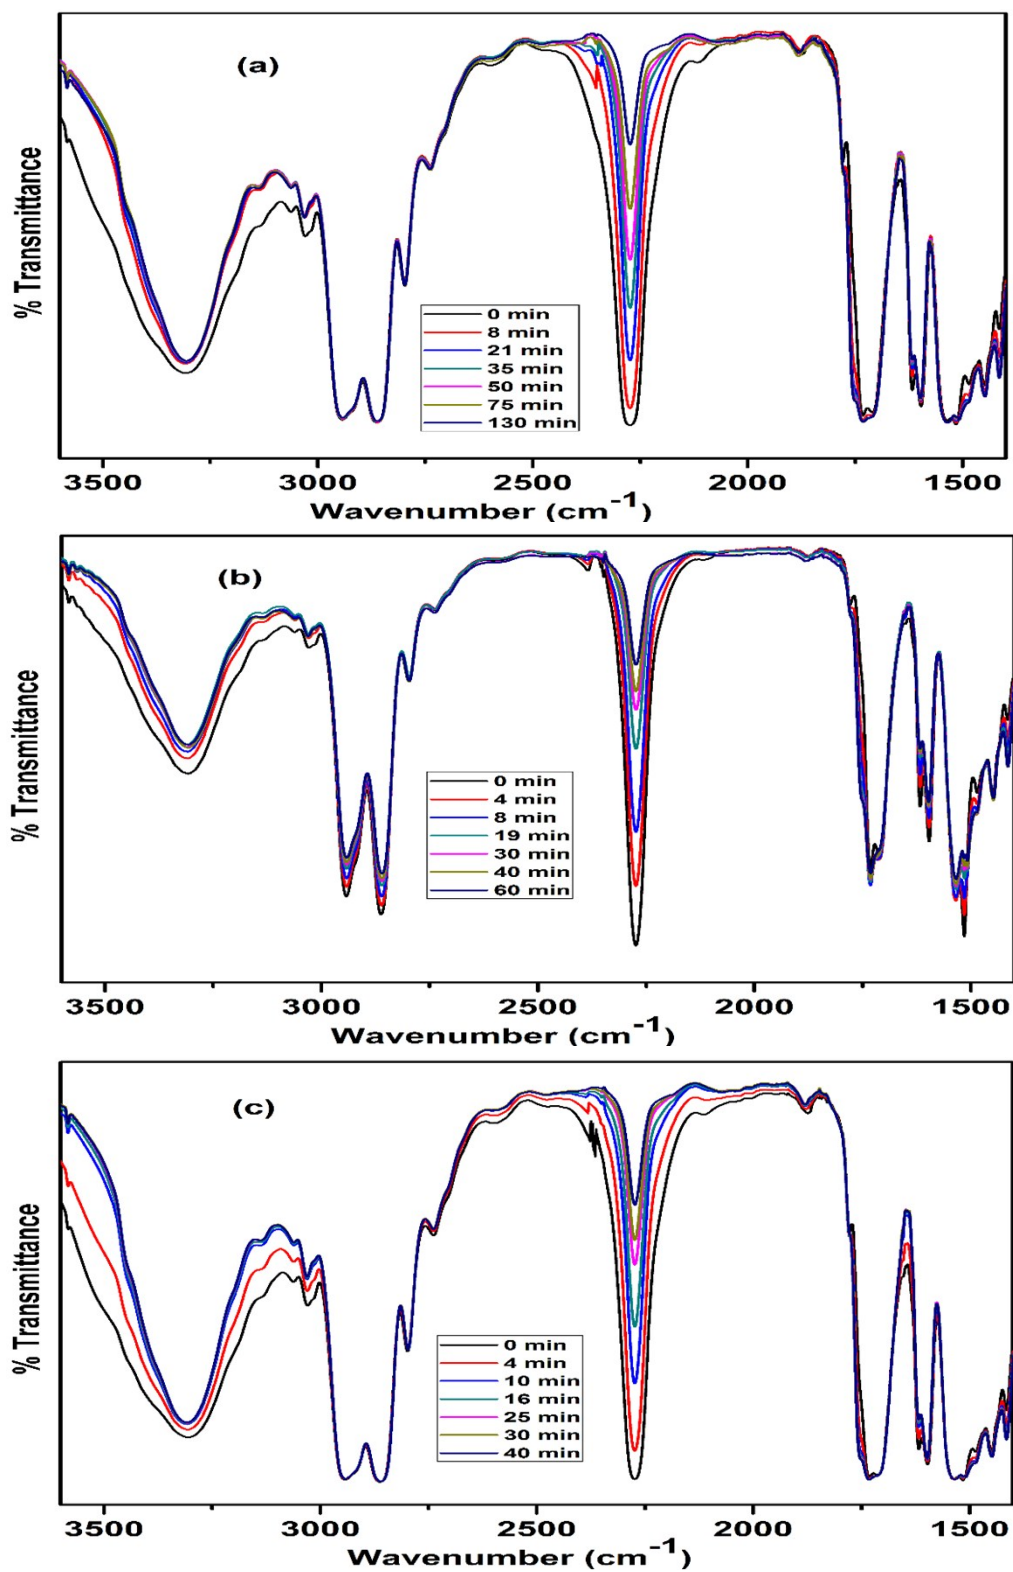

**Figure S10.** FT-IR Spectra recorded for different time intervals at different temperatures for the blocking reaction of polyisocyanate with p-cresol; (a) 40 °C (b) 50 °C and (c) 60 °C.

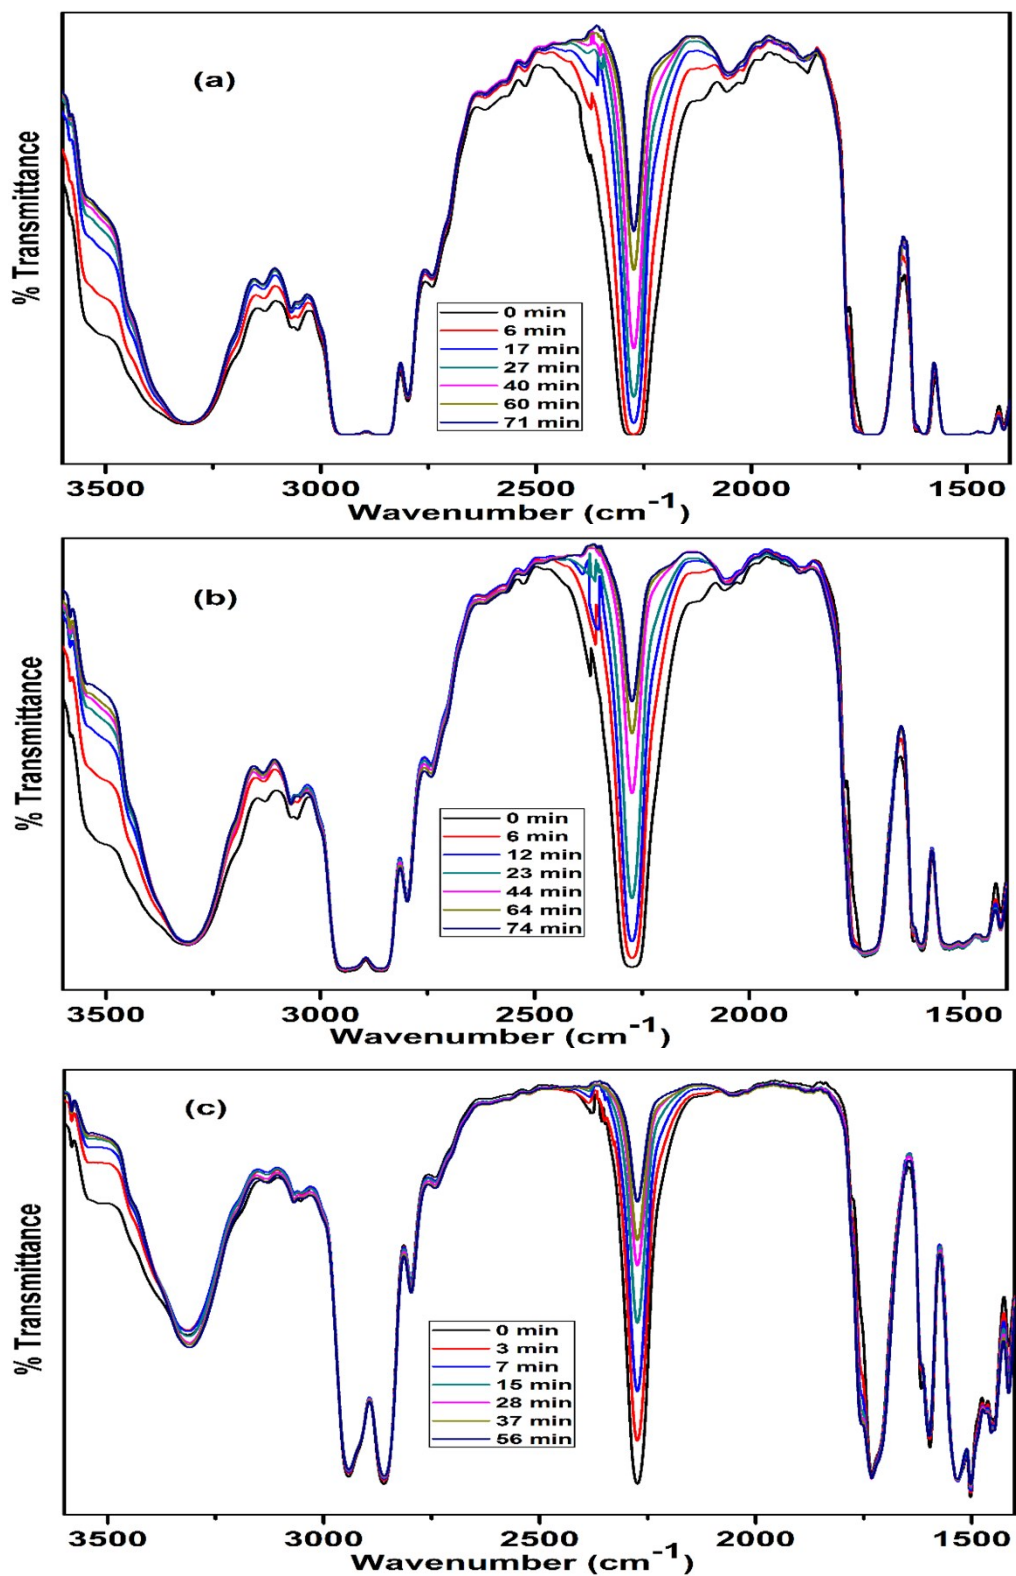

**Figure S11.** FT-IR Spectra recorded for different time intervals at different temperatures for the blocking reaction of polyisocyanate with o-methoxyphenol; (a) 40 °C (b) 50 °C and (c) 60 °C.



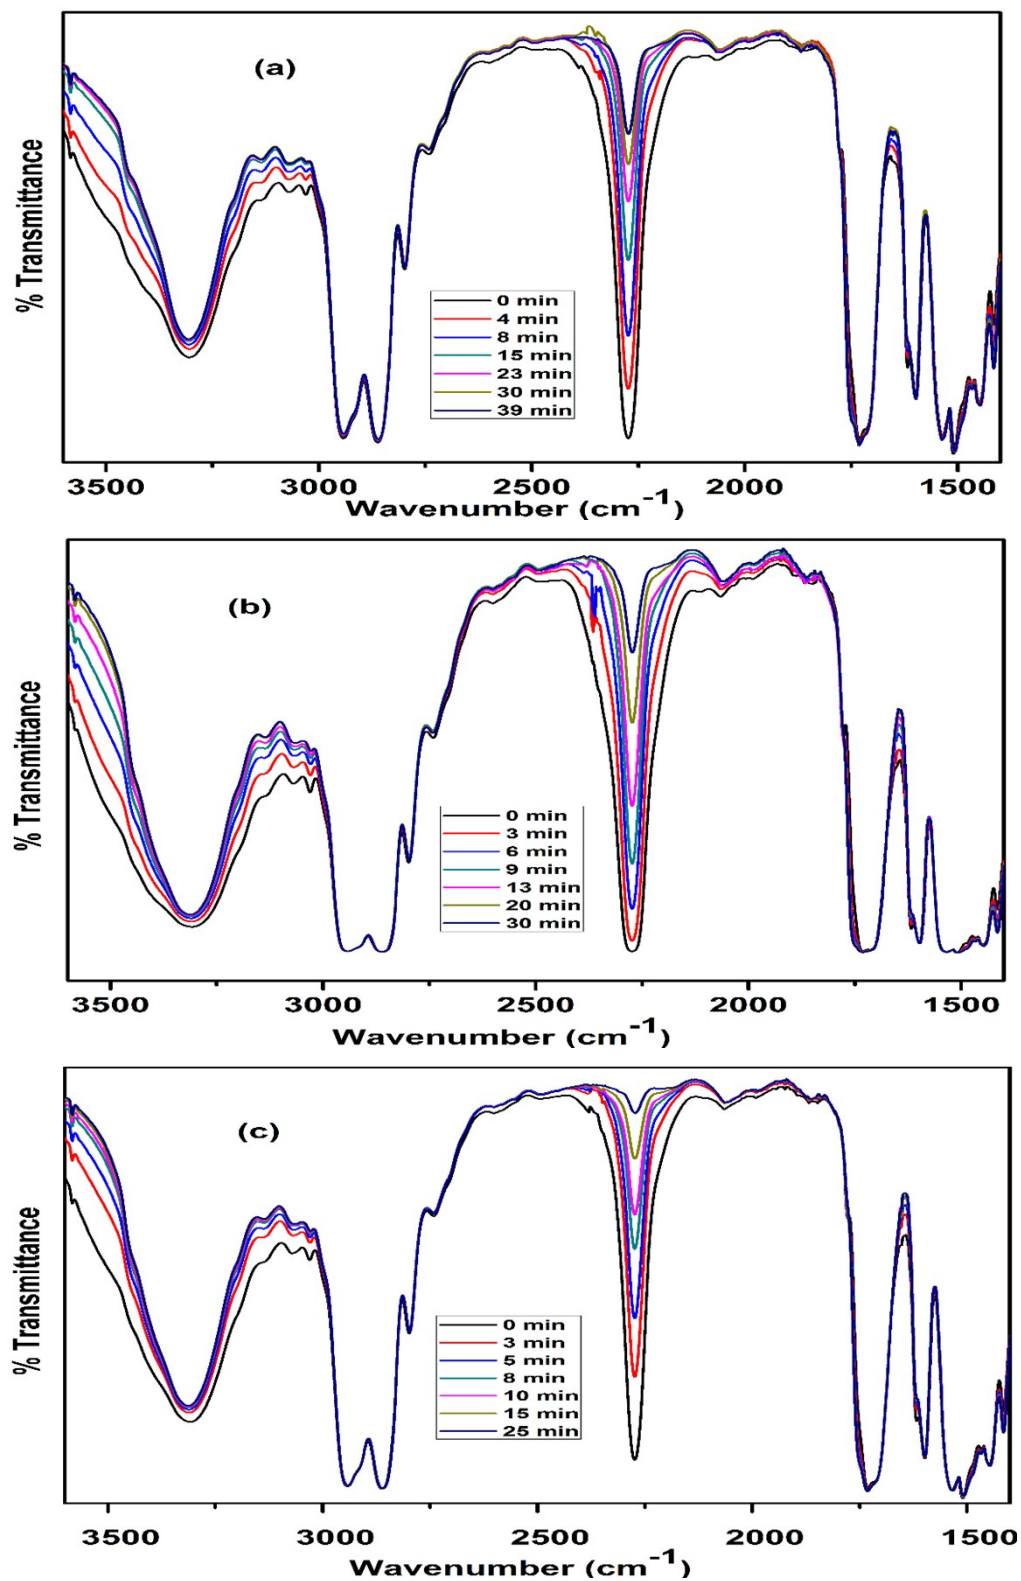

**Figure S12.** FT-IR Spectra recorded for different time intervals at different temperatures for the blocking reaction of polyisocyanate with p-methoxyphenol; (a) 40 °C (b) 50 °C and (c) 60 °C.

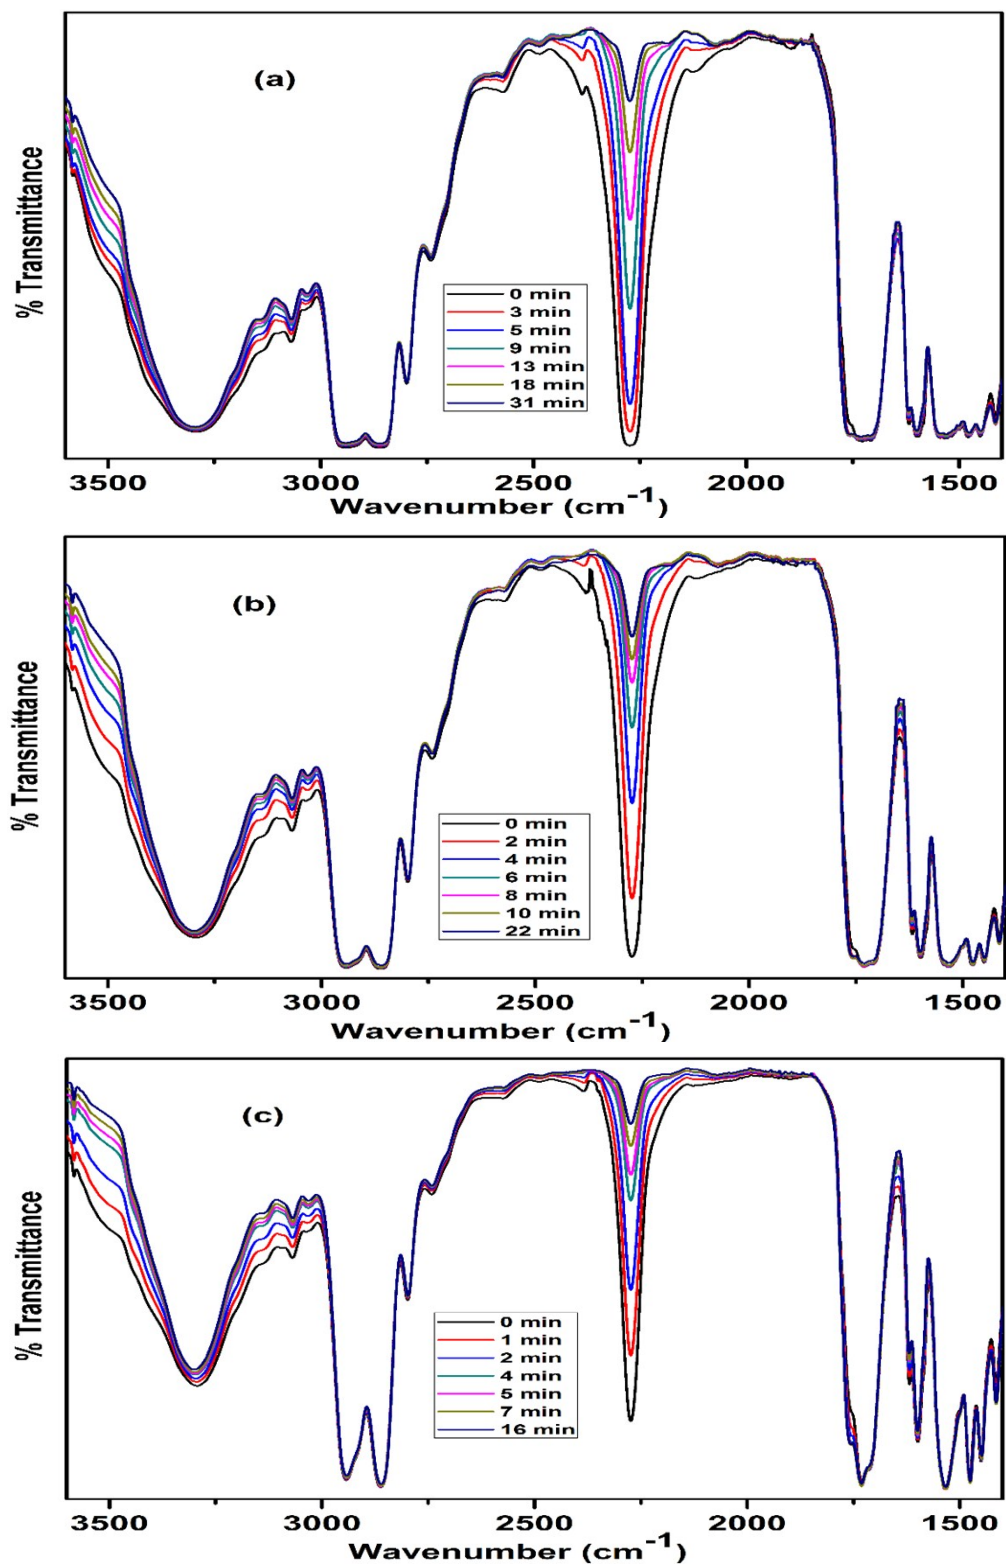

**Figure S13.** FT-IR Spectra recorded for different time intervals at different temperatures for the blocking reaction of polyisocyanate with o-chlorophenol; (a) 40 °C (b) 50 °C and (c) 60 °C.

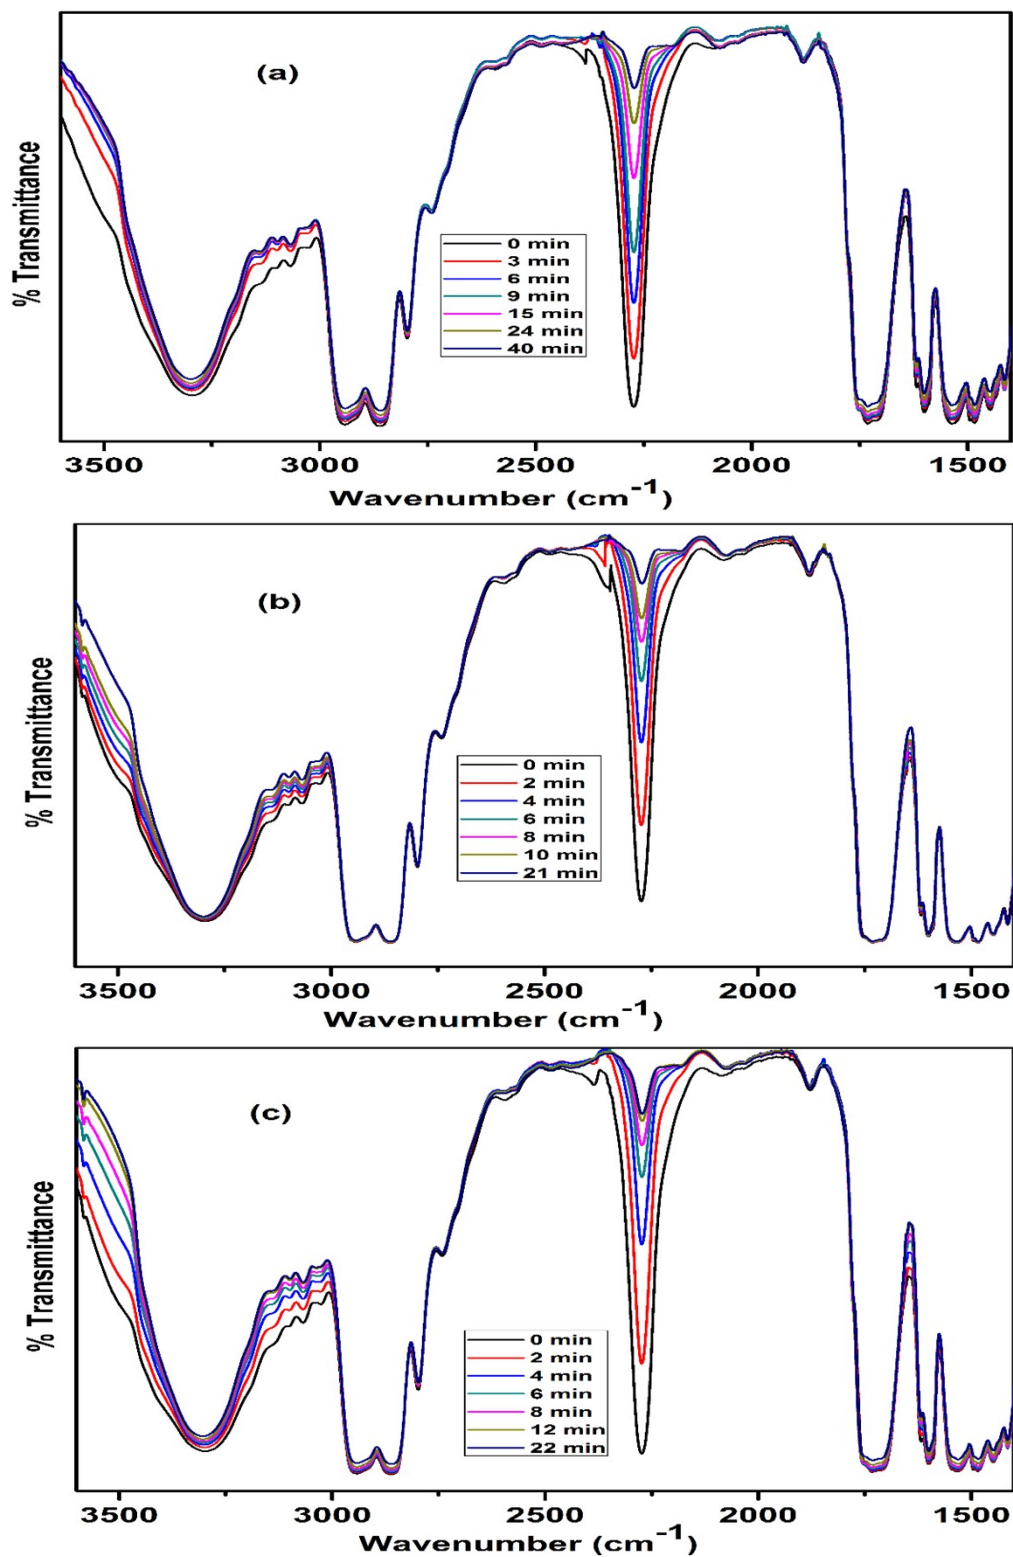

**Figure S14.** FT-IR Spectra recorded for different time intervals at different temperatures for the blocking reaction of polyisocyanate with p-chlorophenol; (a) 40 °C (b) 50 °C and (c) 60 °C.

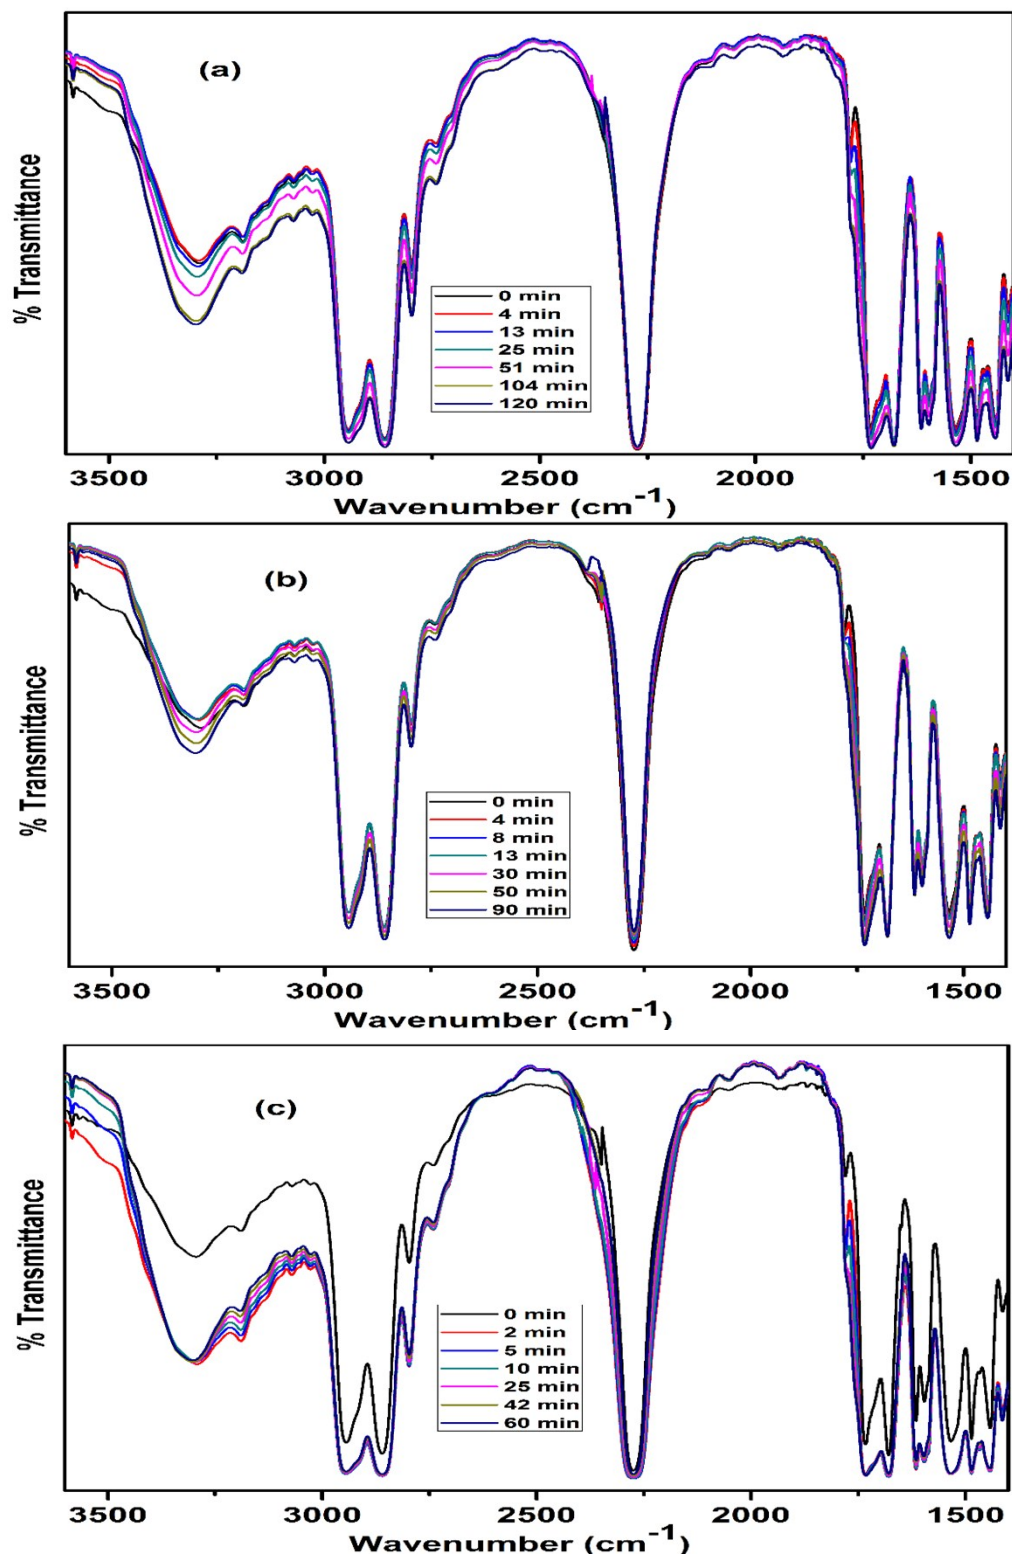

**Figure S15.** FT-IR Spectra recorded for different time intervals at different temperatures for the blocking reaction of polyisocyanate with o-esterphenol; (a) 40 °C (b) 50 °C and (c) 60 °C.



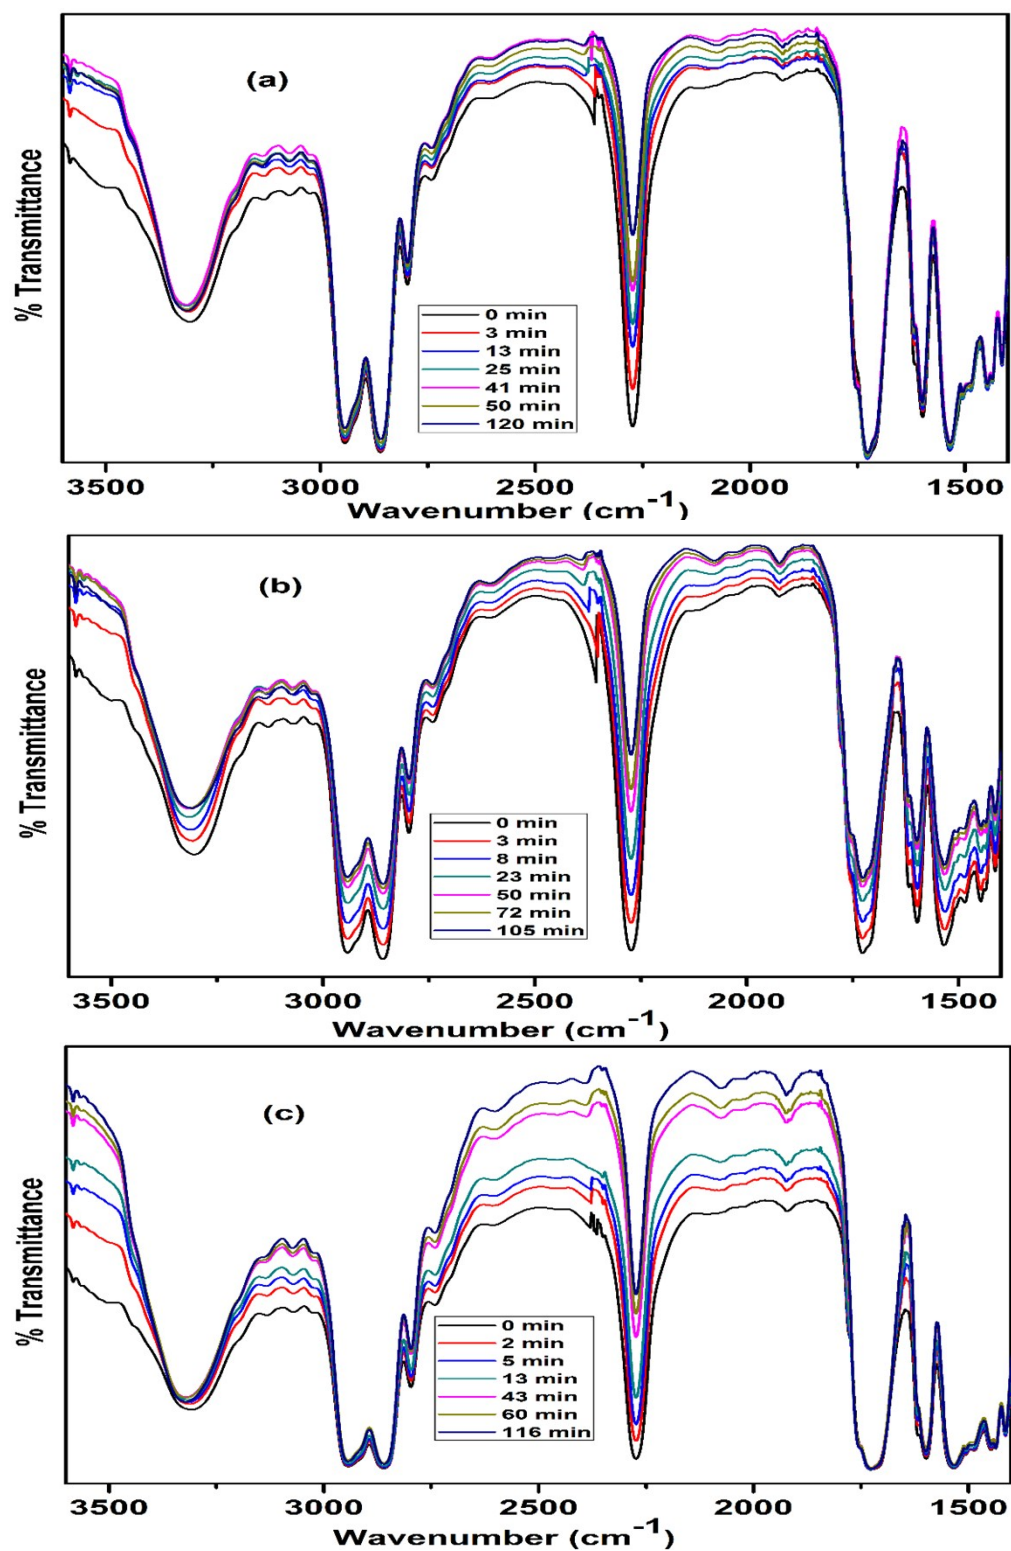

**Figure S16.** FT-IR Spectra recorded for different time intervals at different temperatures for the blocking reaction of polyisocyanate with p-esterphenol; (a) 40 °C (b) 50 °C and (c) 60 °C.

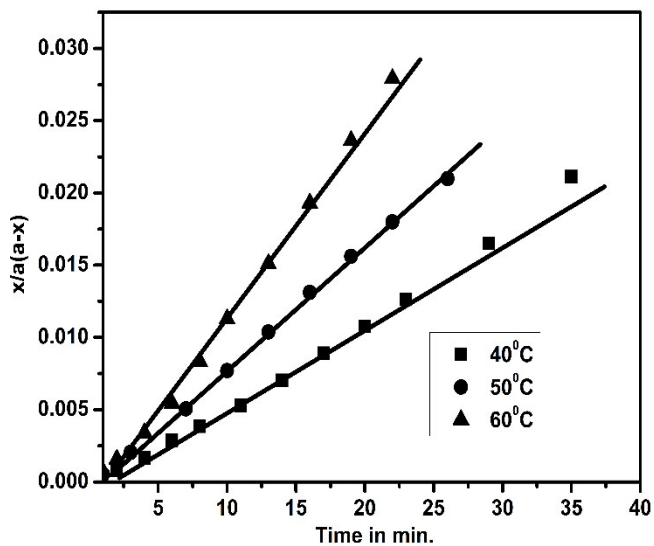

**Figure S17.** Amine-catalysed second-order kinetic plots of blocking reaction of polyisocyanate with o-cresol.

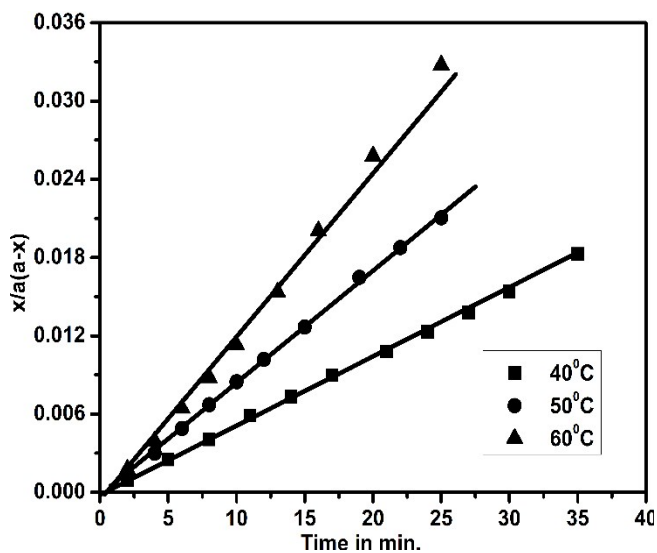

**Figure S18.** Amine-catalysed second-order kinetic plots of blocking reaction of polyisocyanate with p-cresol.

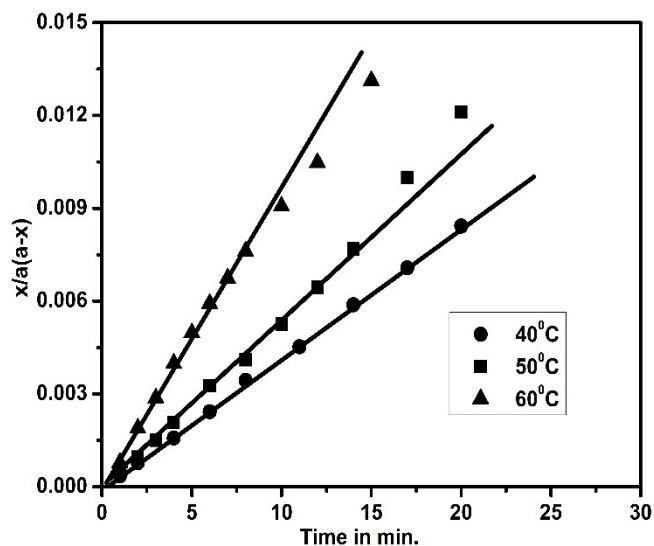

**Figure S19.** Amine-catalysed second-order kinetic plots of blocking reaction of polyisocyanate with o-methoxyphenol

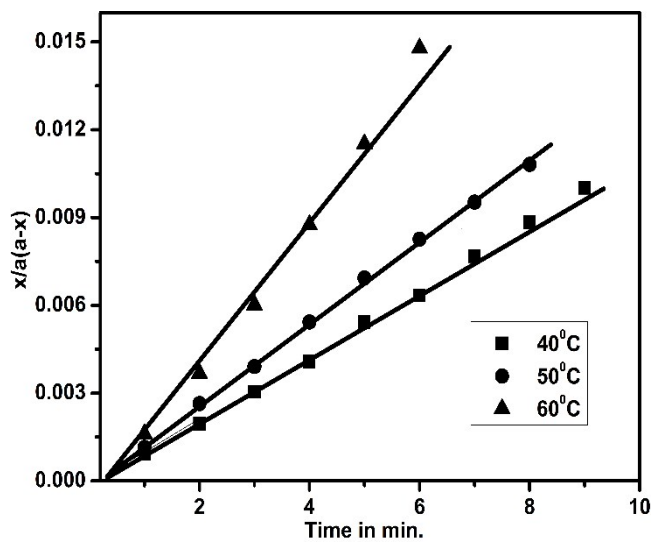

**Figure S20.** Amine-catalysed second-order kinetic plots of blocking reaction of polyisocyanate with p-methoxyphenol.

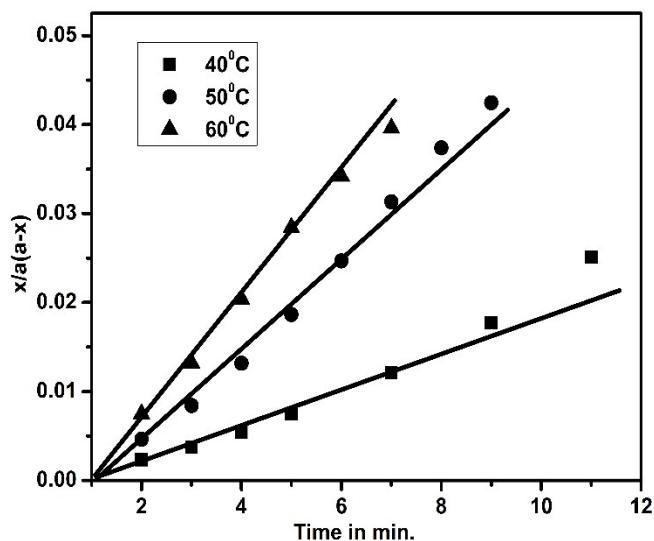

**Figure S21.** Amine-catalysed second-order kinetic plots of blocking reaction of polyisocyanate with o-chlorophenol.

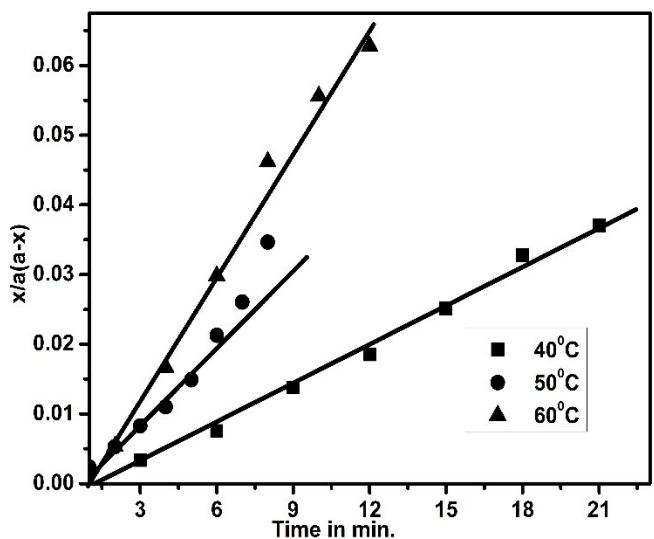

**Figure S22.** Amine-catalysed second-order kinetic plots of blocking reaction of polyisocyanate with p-chlorophenol.

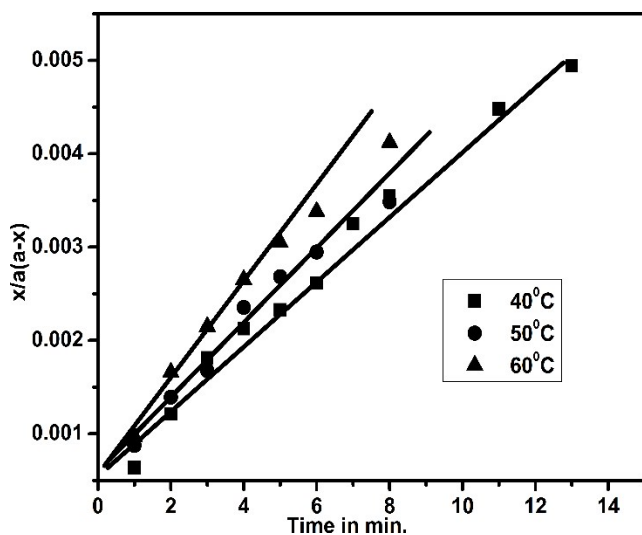

**Figure S23.** Amine-catalysed second-order kinetic plots of blocking reaction of polyisocyanate with o-esterphenol.

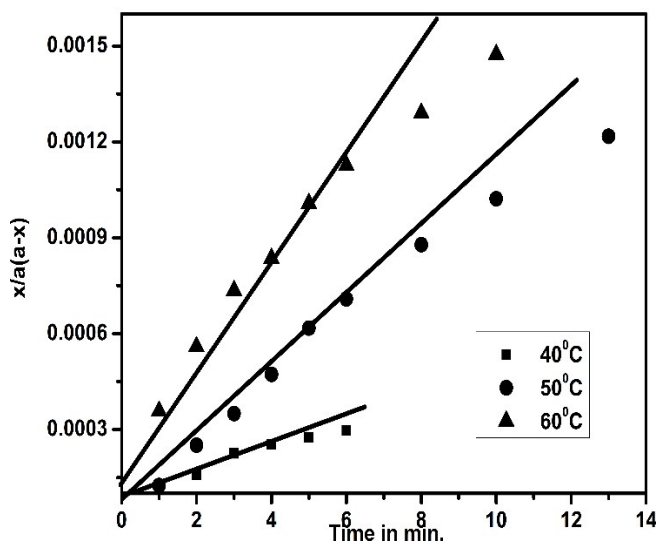

**Figure S24.** Amine-catalysed second-order kinetic plots of blocking reaction of polyisocyanate with p-esterphenol.



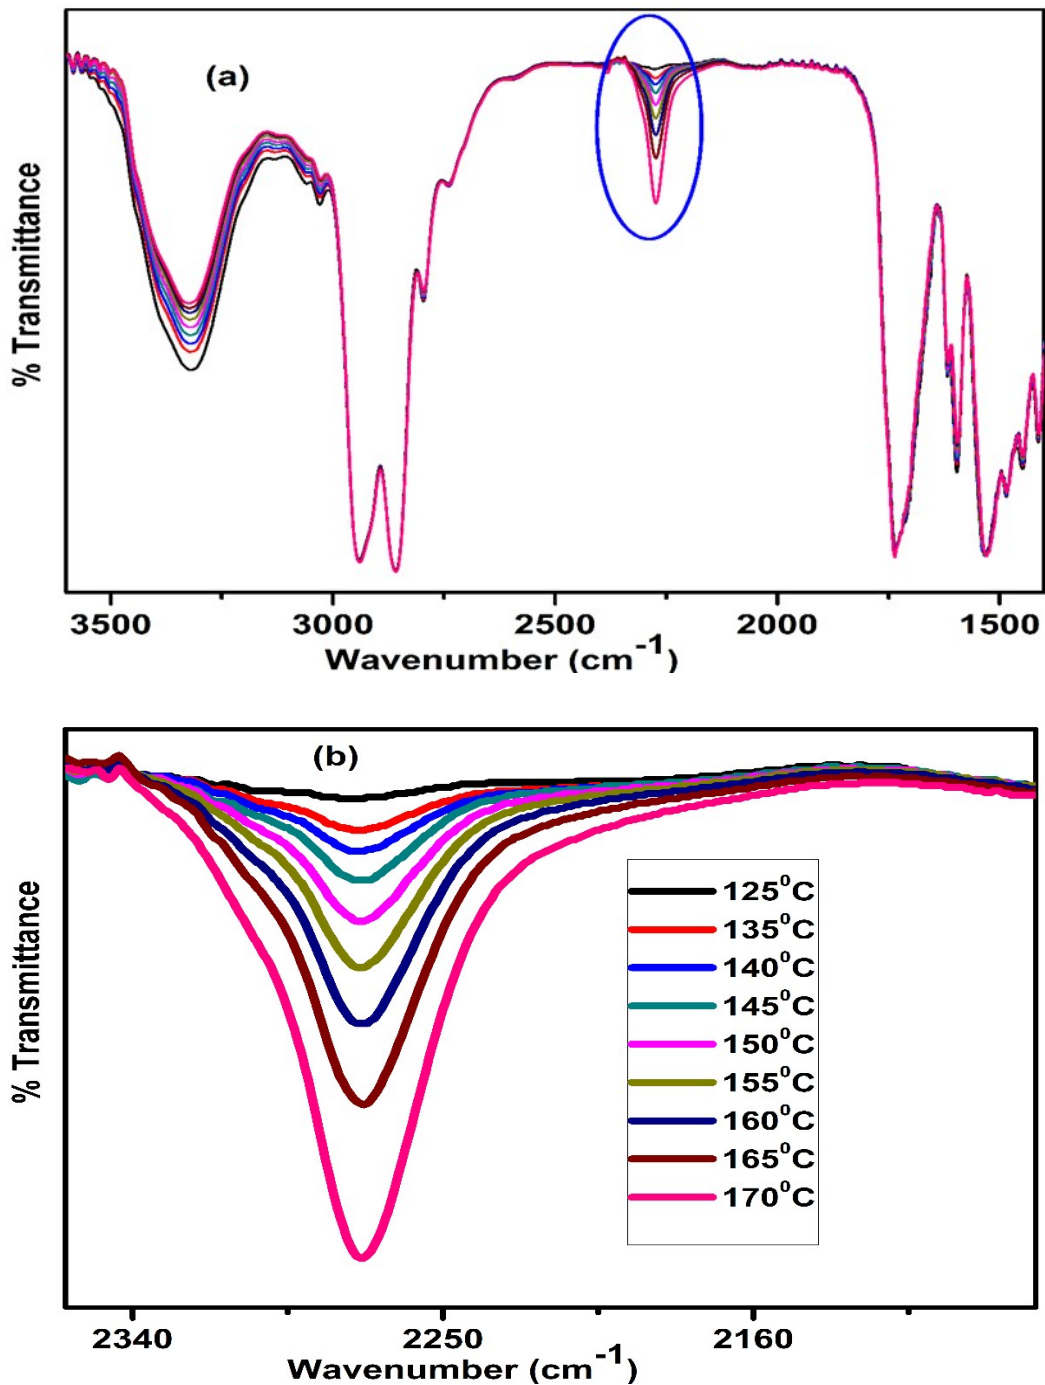

**Figure S25.** FT-IR spectra of o-cresol-blocked polyisocyanate recorded at (a) different temperatures. (b) Zoomed range of isocyanate absorption region.

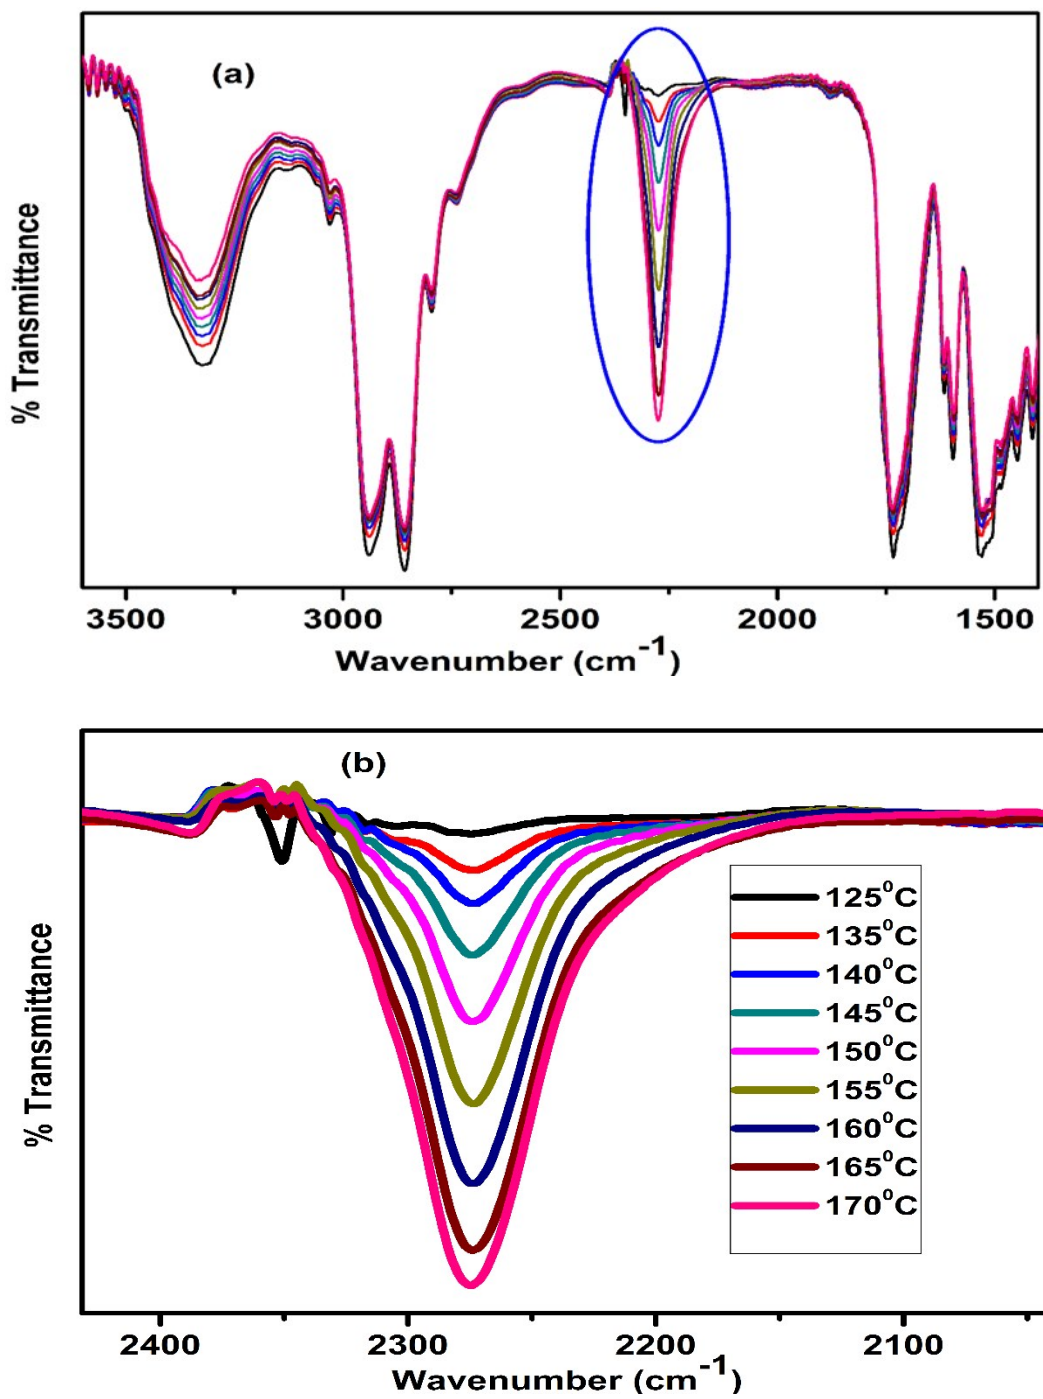

**Figure S26.** FT-IR spectra of p-cresol-blocked polyisocyanate recorded at (a) different temperatures. (b) Zoomed range of isocyanate absorption region.

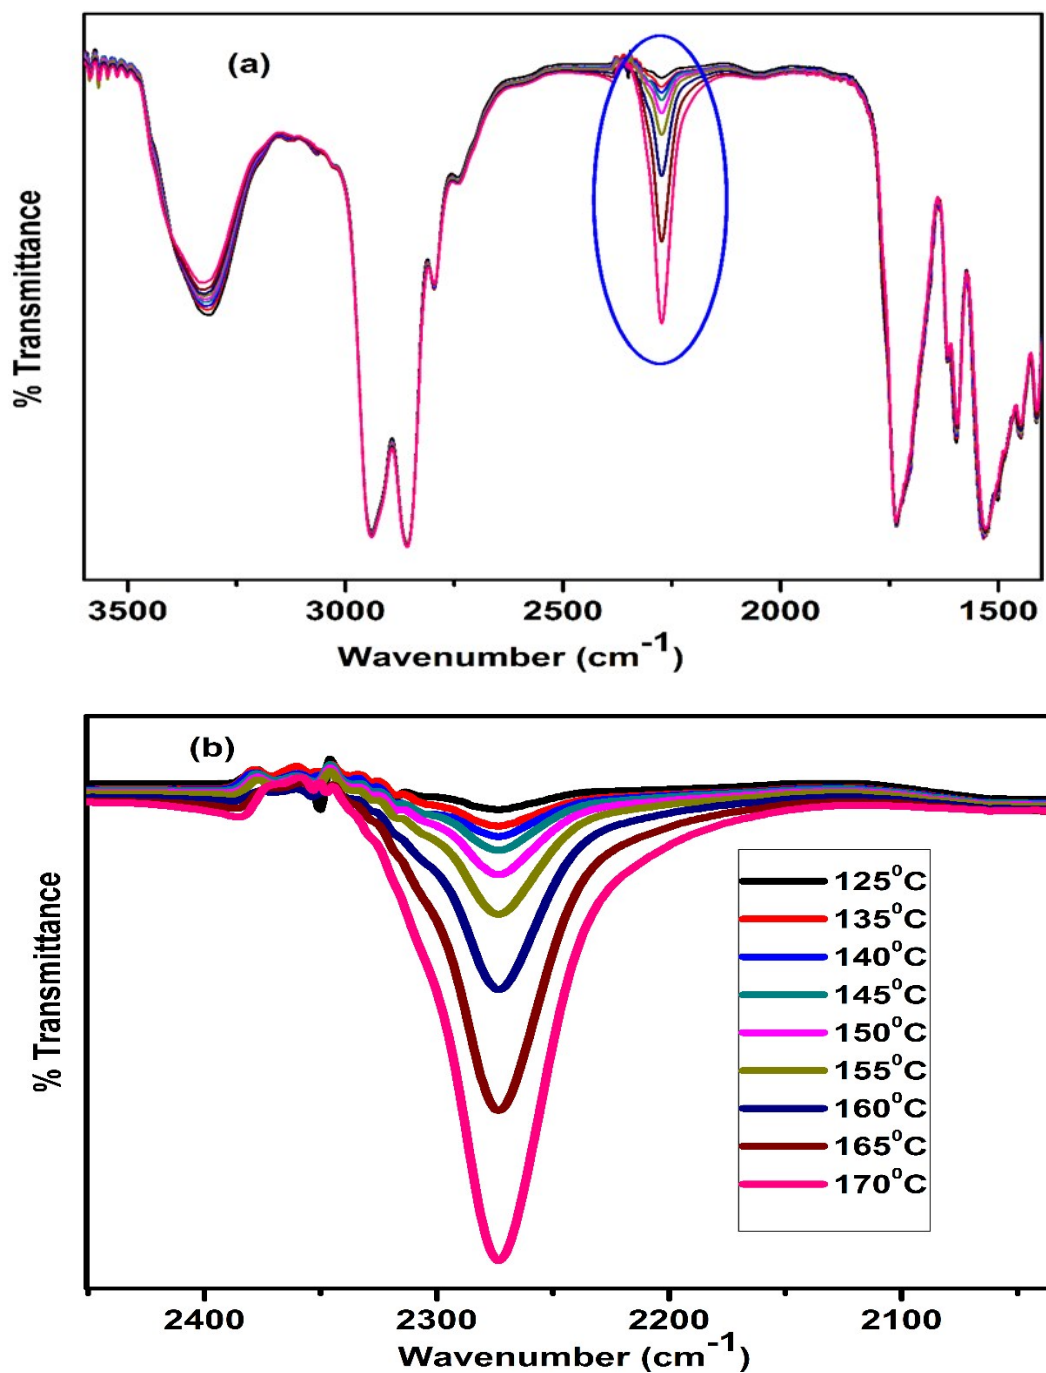

**Figure S27.** FT-IR spectra of *o*-methoxyphenol-blocked polyisocyanate recorded at (a) different temperatures. (b) Zoomed range of isocyanate absorption region.

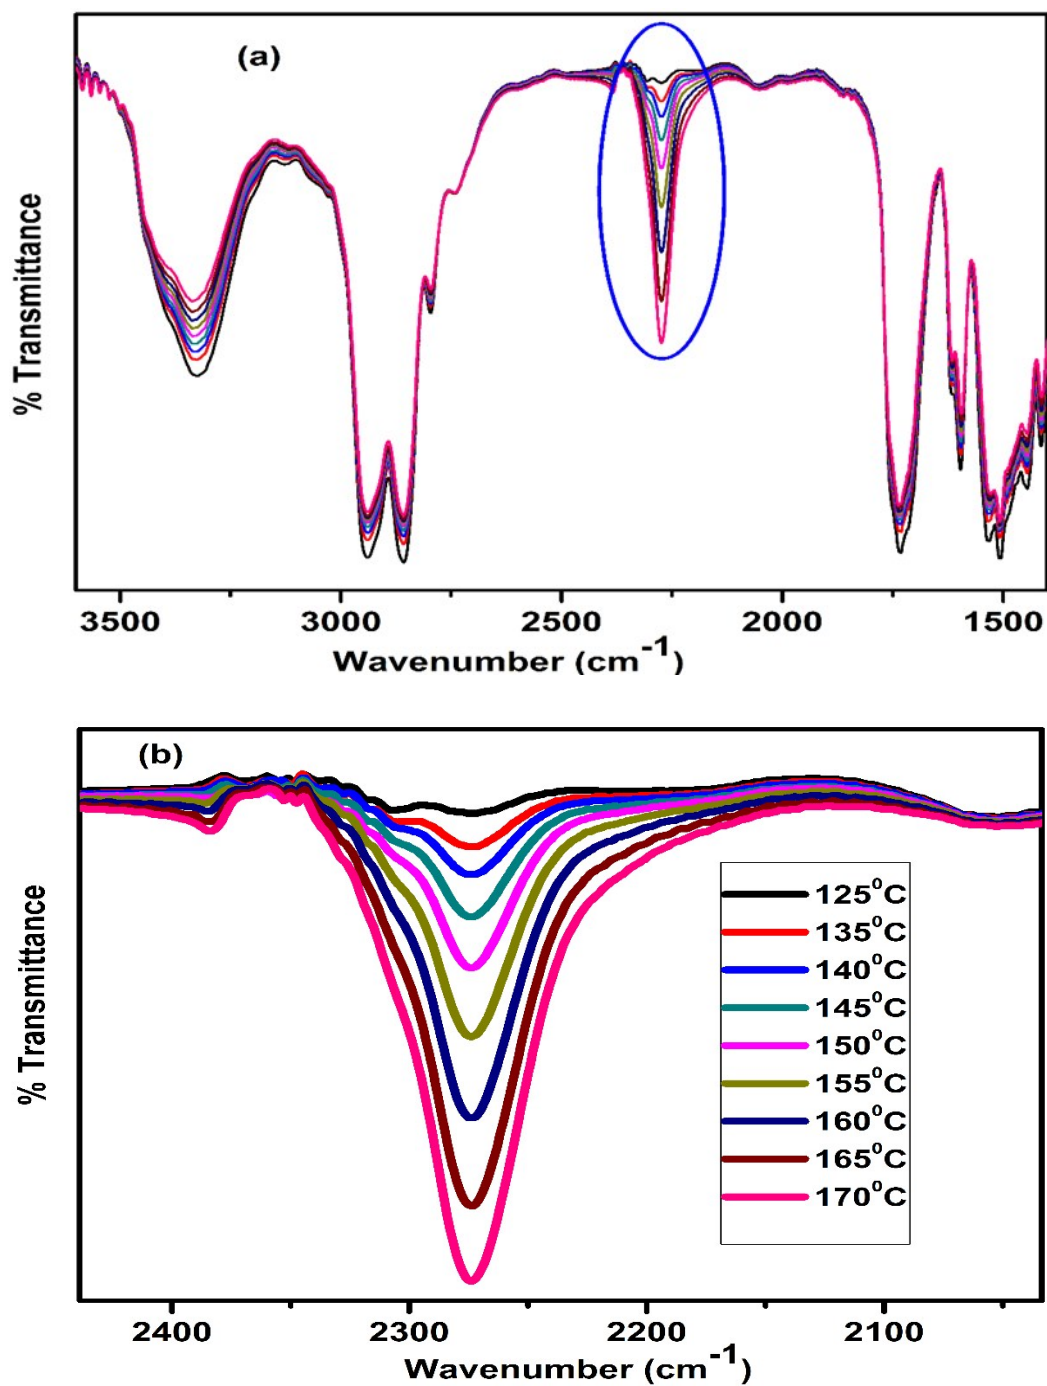

**Figure S28.** FT-IR spectra of p-methoxyphenol-blocked polyisocyanate recorded at (a) different temperatures. (b) Zoomed range of isocyanate absorption region.

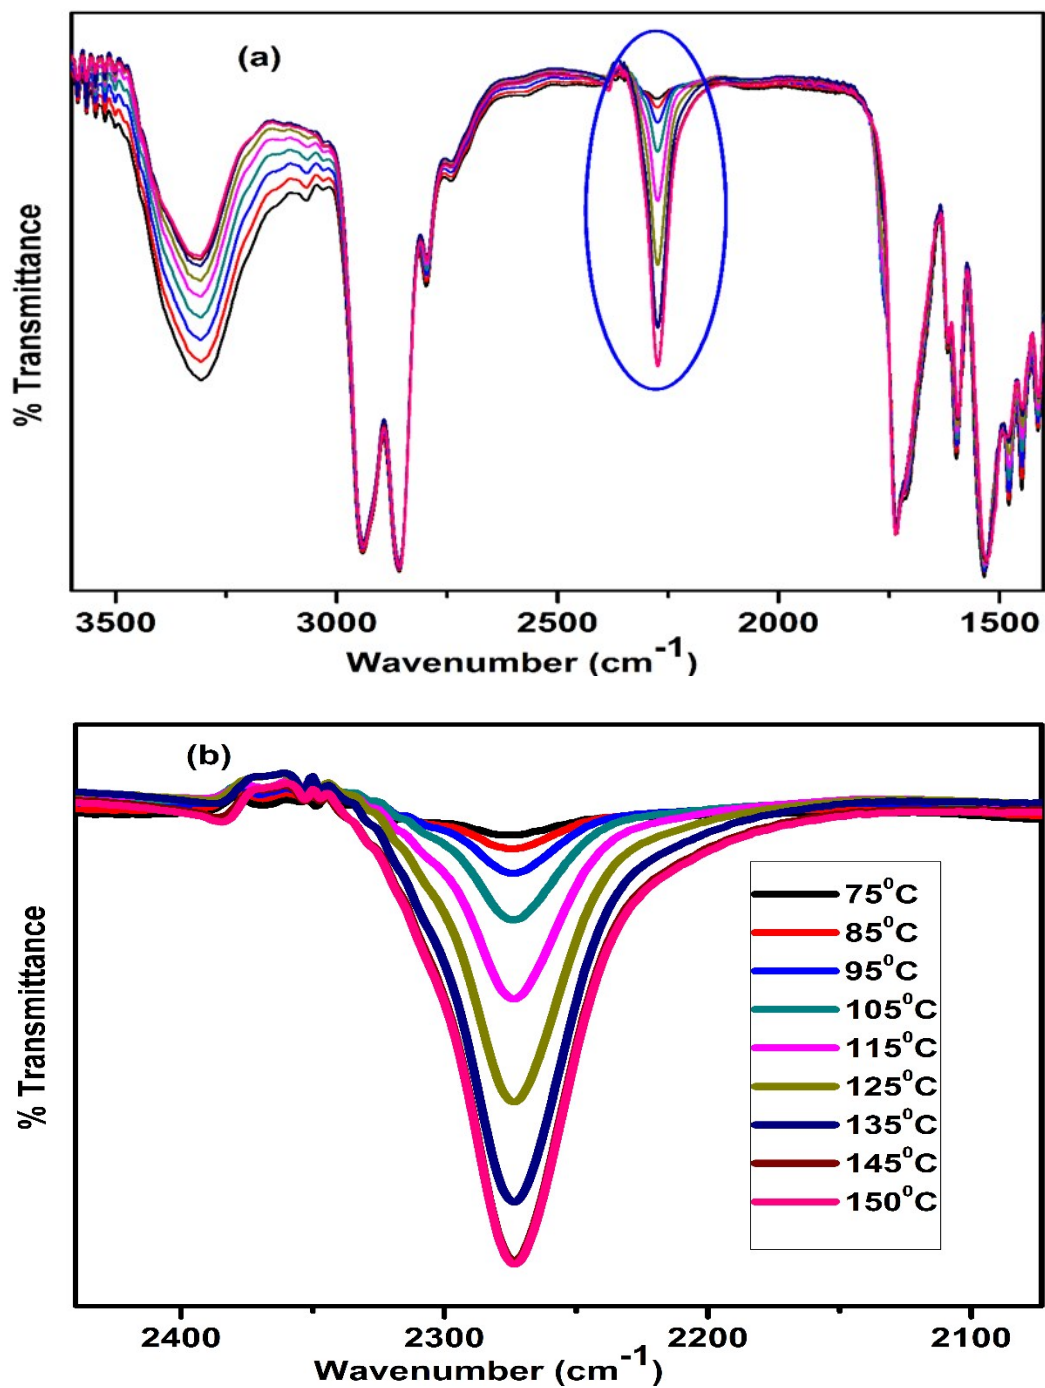

**Figure S29.** FT-IR spectra of o-chlorophenol-blocked polyisocyanate recorded at (a) different temperatures. (b) Zoomed range of isocyanate absorption region.

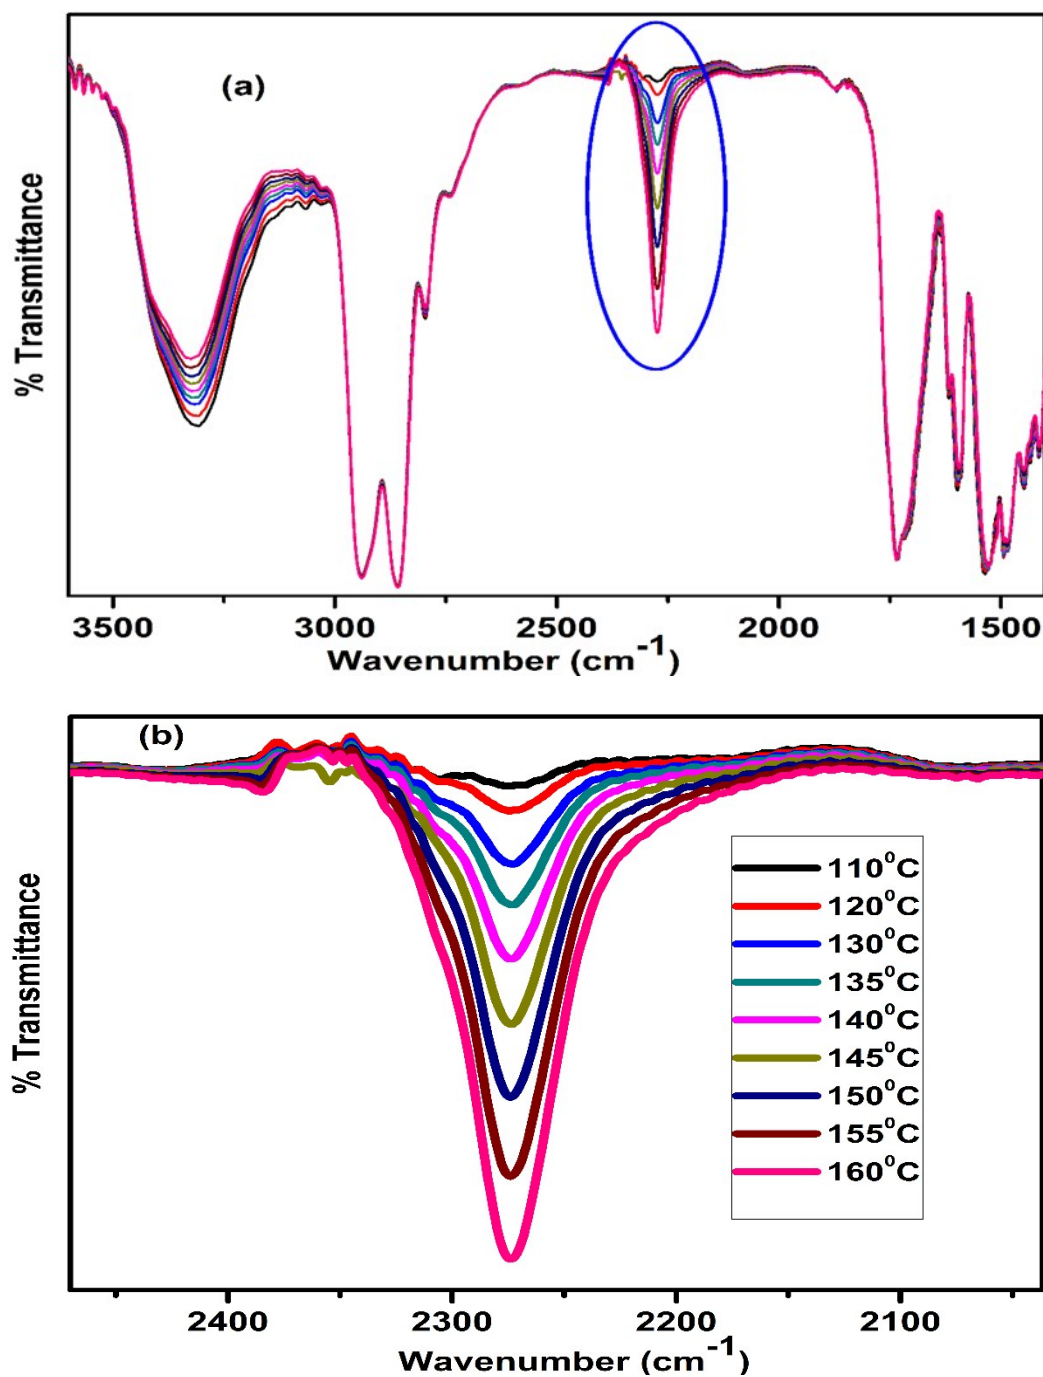

**Figure S30.** FT-IR spectra of p-chlorophenol-blocked polyisocyanate recorded at (a) different temperatures. (b) Zoomed range of isocyanate absorption region.



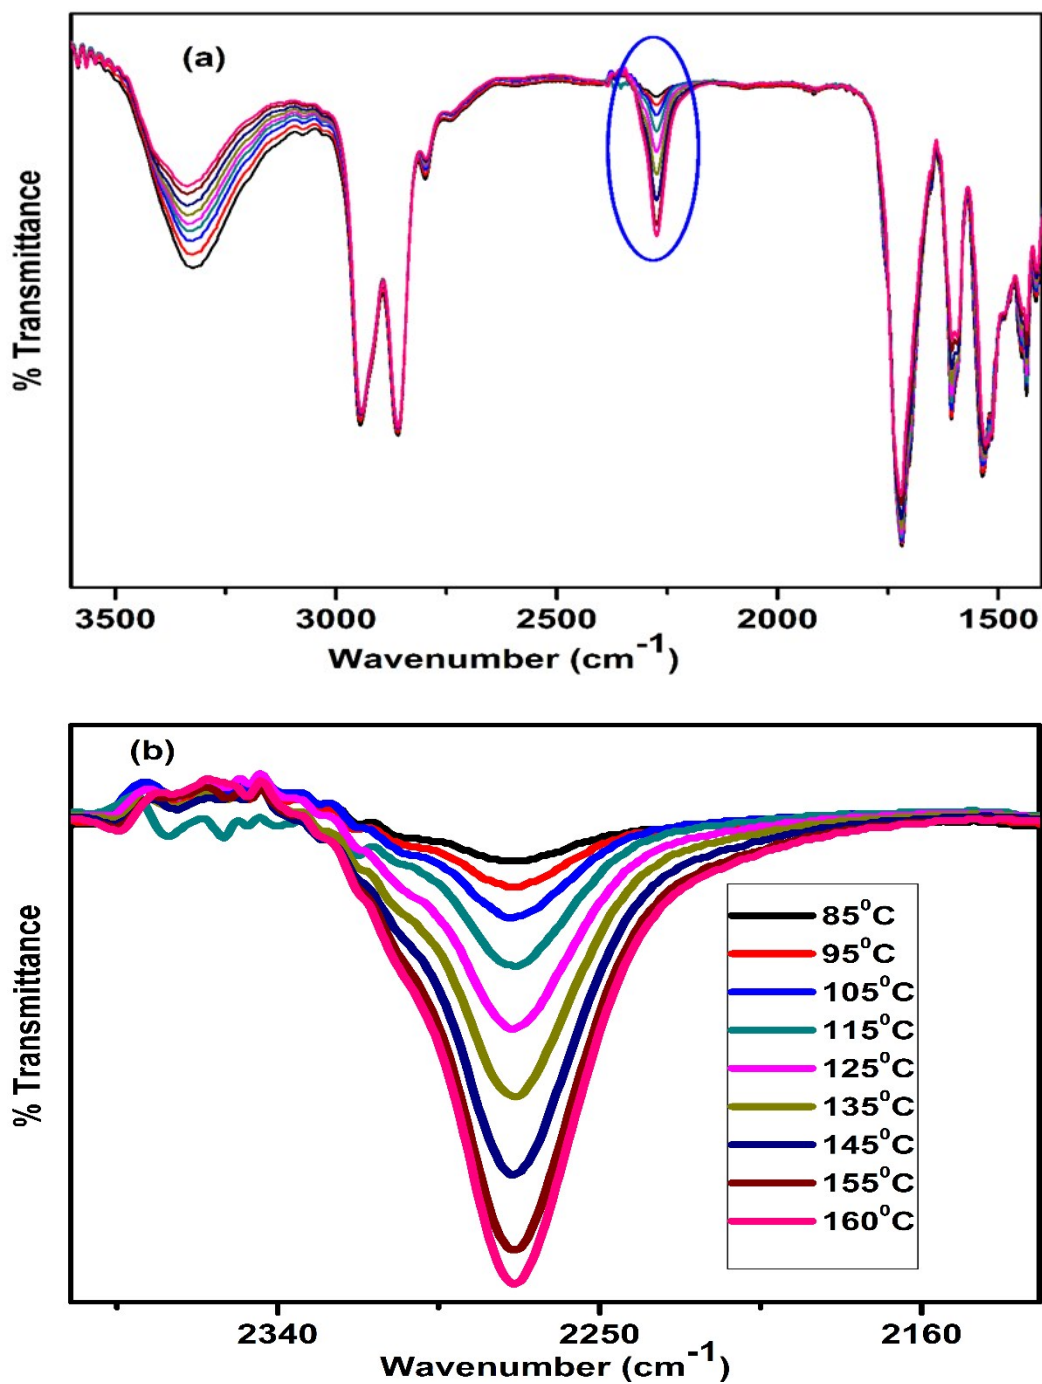

**Figure S31.** FT-IR spectra of p-esterphenol-blocked polyisocyanate recorded at (a) different temperatures. (b) Zoomed range of isocyanate absorption region.

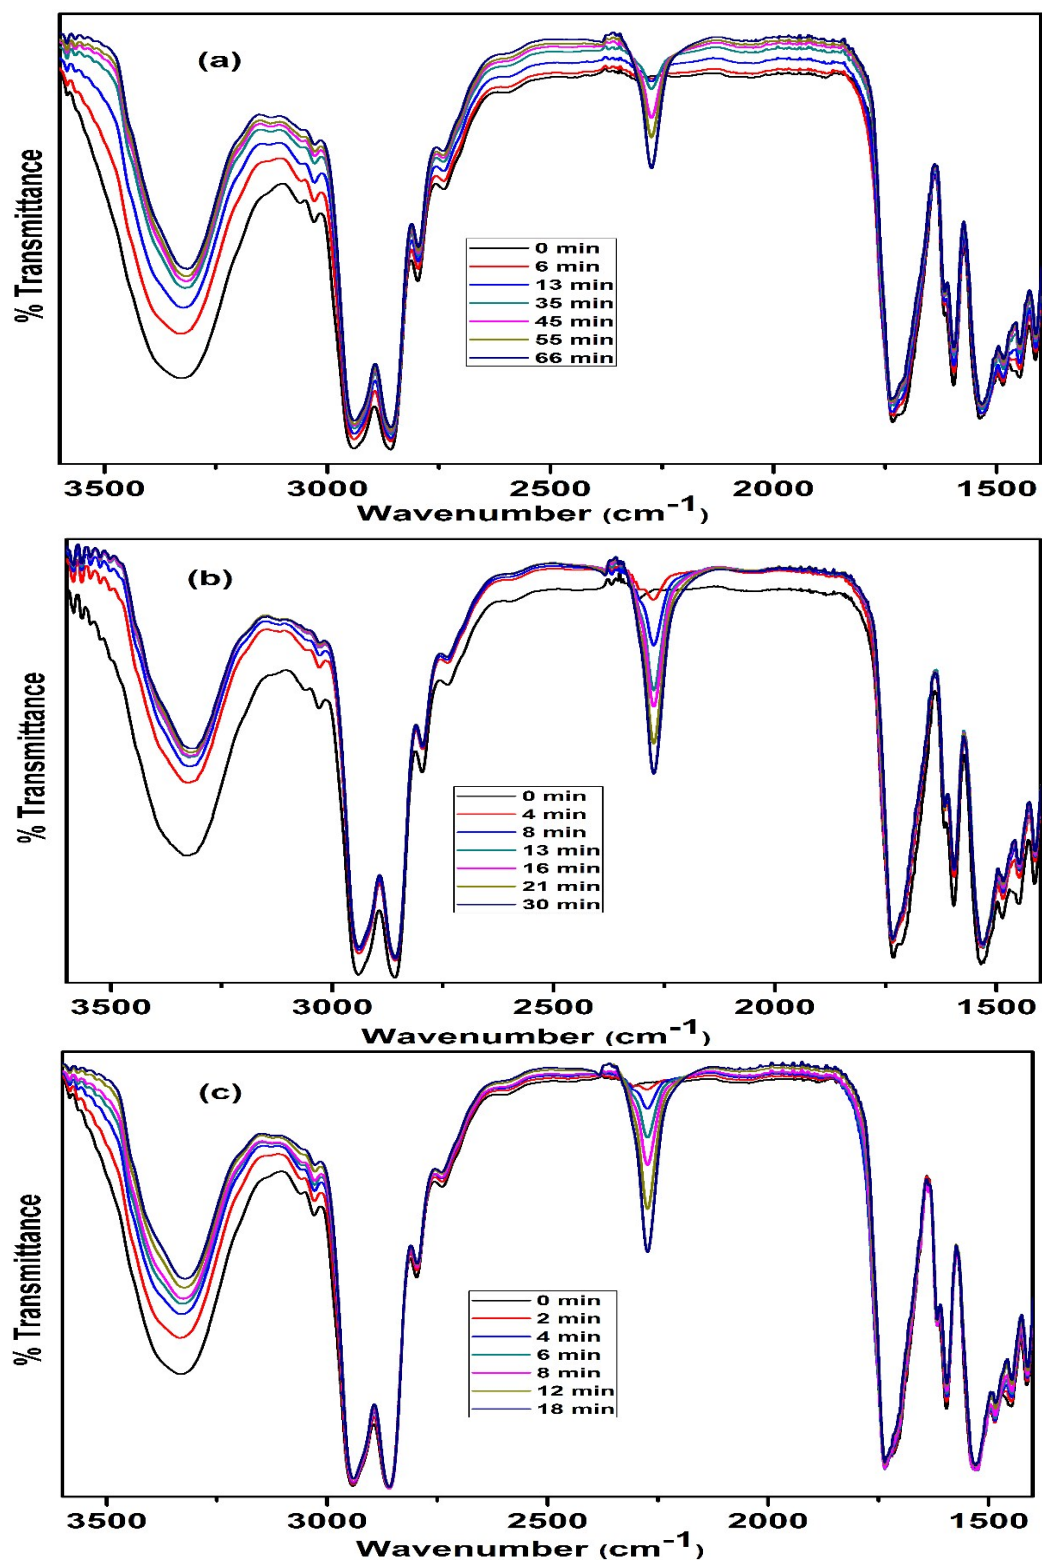

**Figure S32.** FT-IR Spectra recorded for different time intervals at different temperatures for the deblocking reaction of o-cresol-blocked polyisocyanate; (a) 120 °C (b) 130 °C and (c) 140 °C.



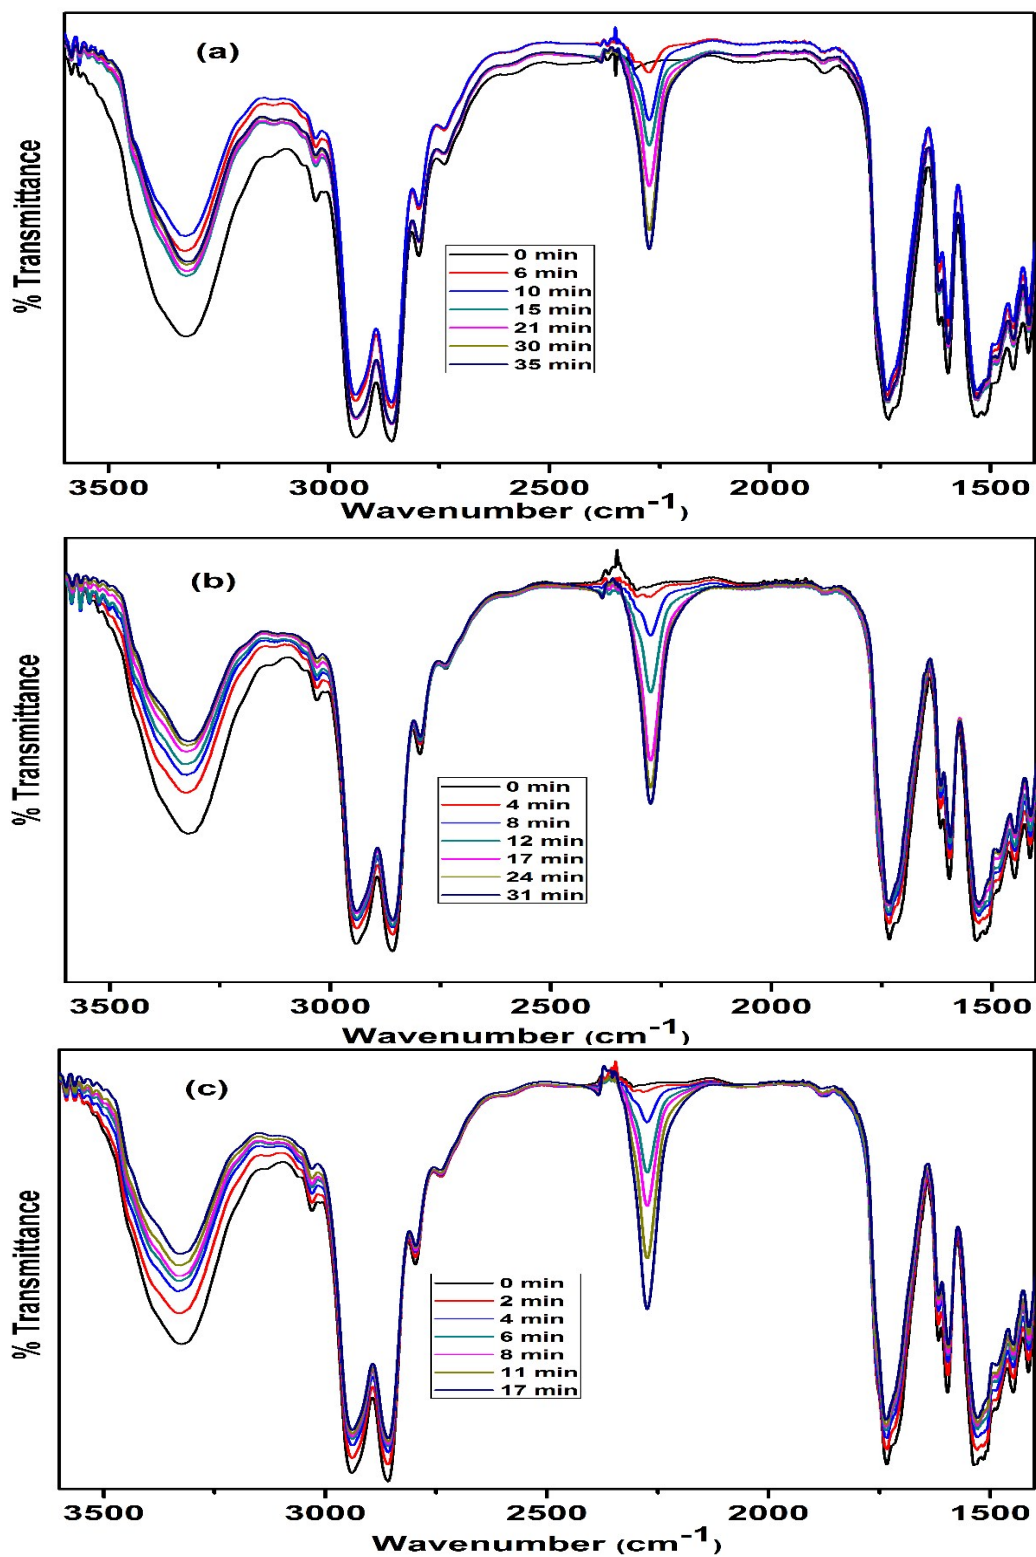

**Figure S33.** FT-IR Spectra recorded for different time intervals at different temperatures for the deblocking reaction of p-cresol-blocked polyisocyanate; (a) 120 °C (b) 130 °C and (c) 140 °C.

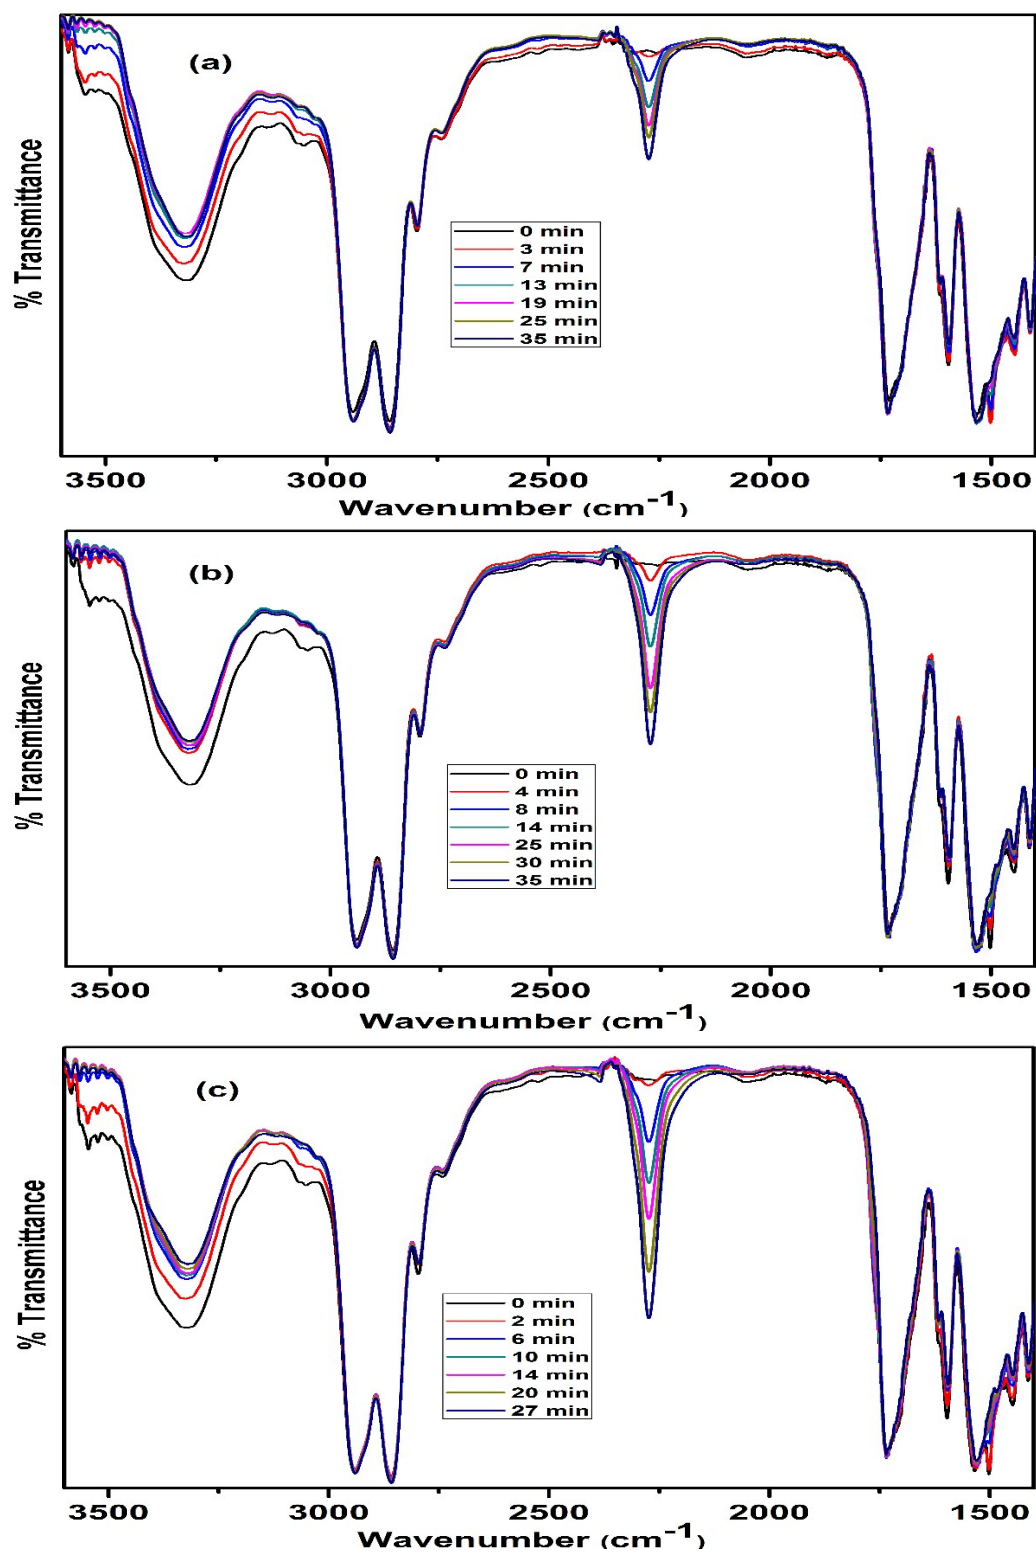

**Figure S34.** FT-IR Spectra recorded for different time intervals at different temperatures for the deblocking reaction of o-methoxyphenol-blocked polyisocyanate; (a) 120 °C (b) 130 °C and (c) 140 °C.

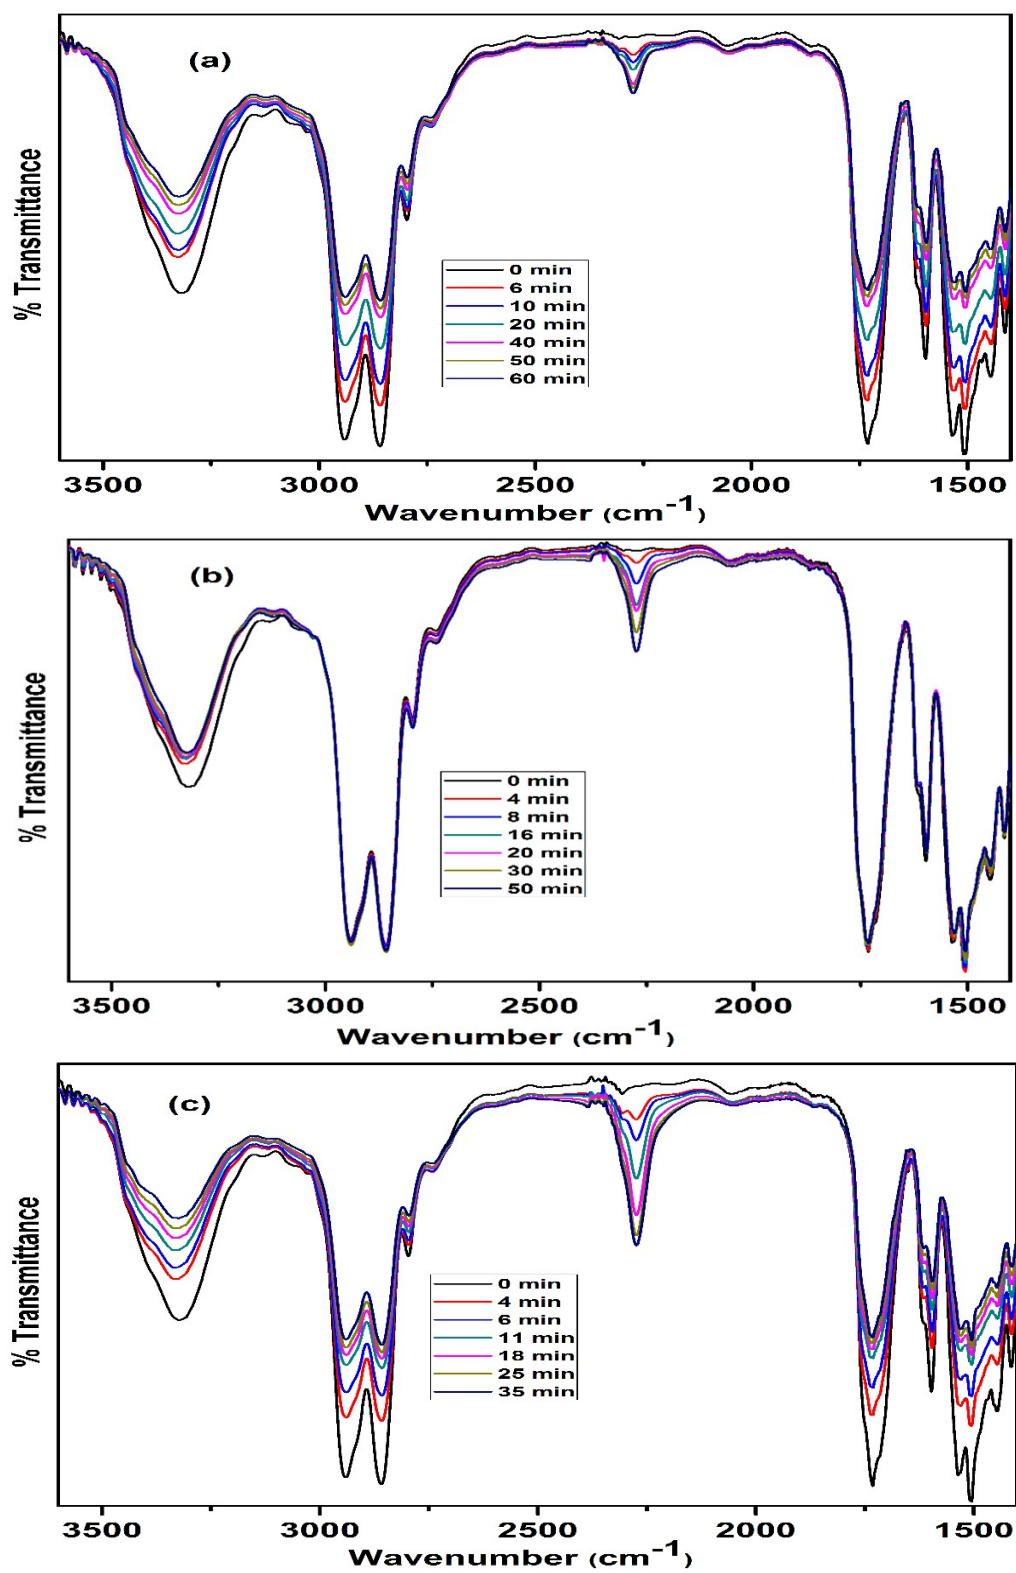

**Figure S35.** FT-IR Spectra recorded for different time intervals at different temperatures for the deblocking reaction of p-methoxyphenol-blocked polyisocyanate; (a) 120 °C (b) 130 °C and (c) 140 °C.

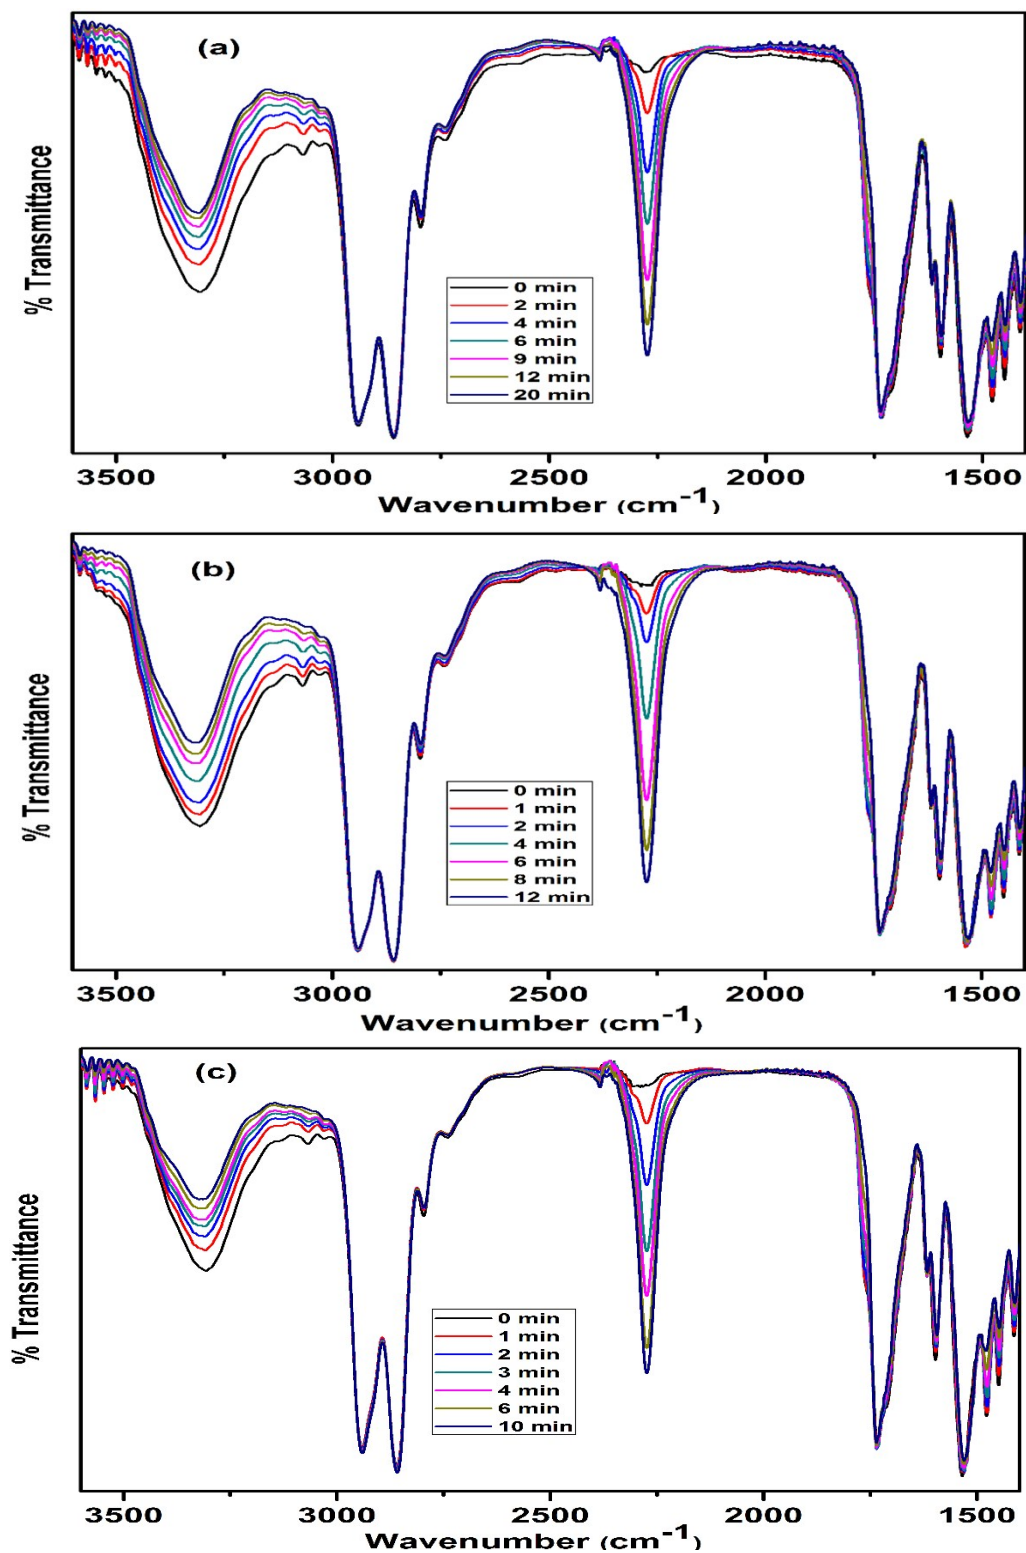

**Figure S36.** FT-IR Spectra recorded for different time intervals at different temperatures for the deblocking reaction of o-chlorophenol-blocked polyisocyanate; (a) 120 °C (b) 130 °C and (c) 140 °C.

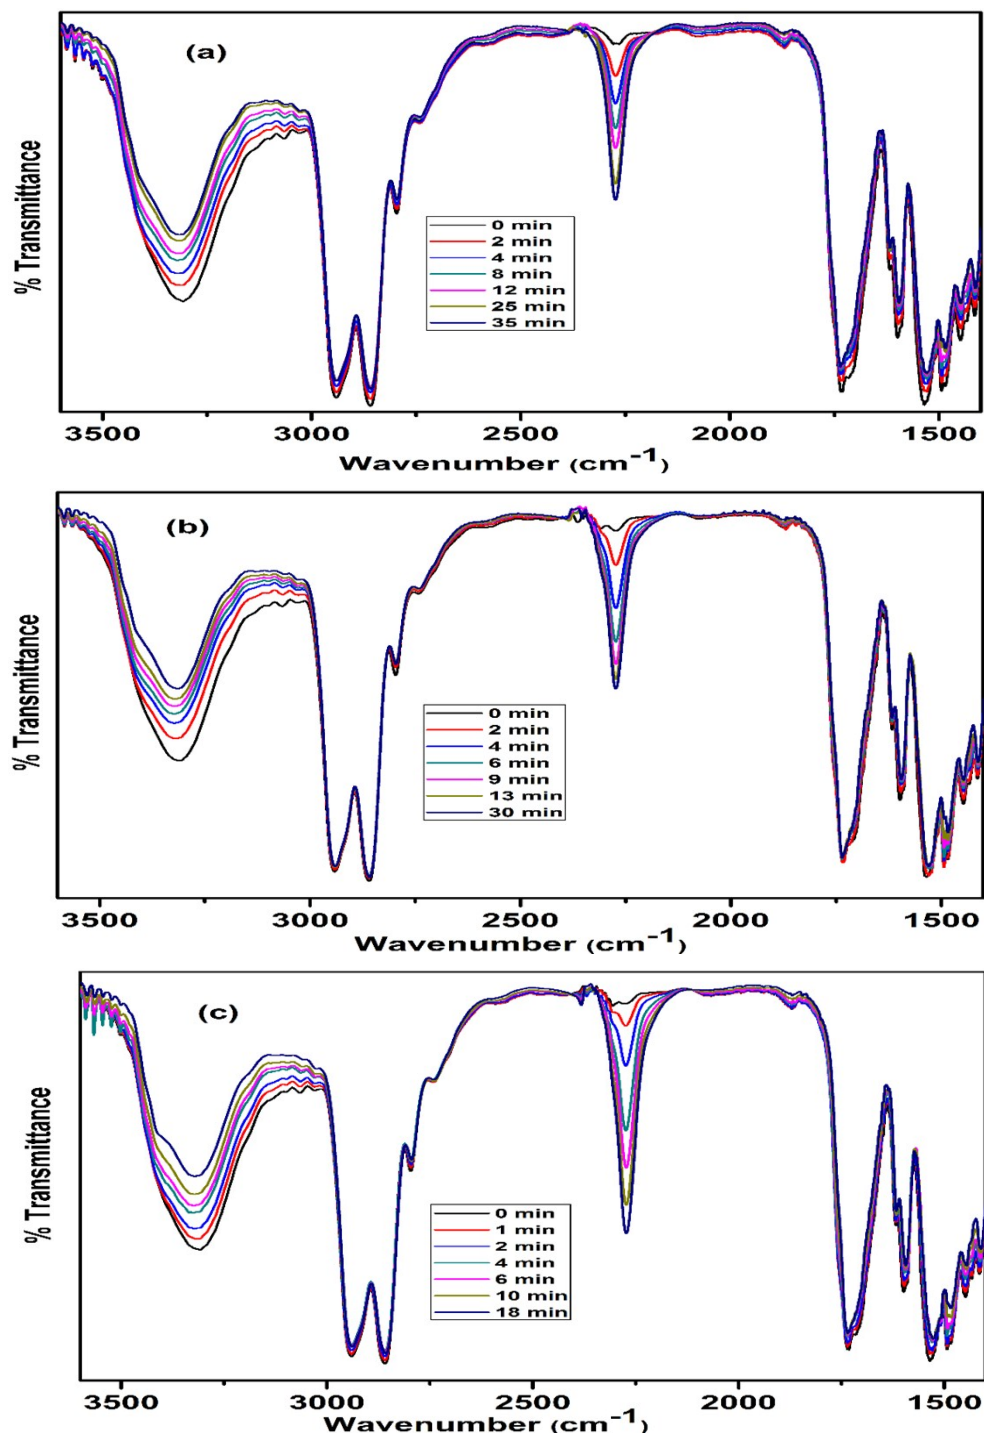

**Figure S37.** FT-IR Spectra recorded for different time intervals at different temperatures for the deblocking reaction of p-chlorophenol-blocked polyisocyanate; (a) 120 °C (b) 130 °C and (c) 140 °C.



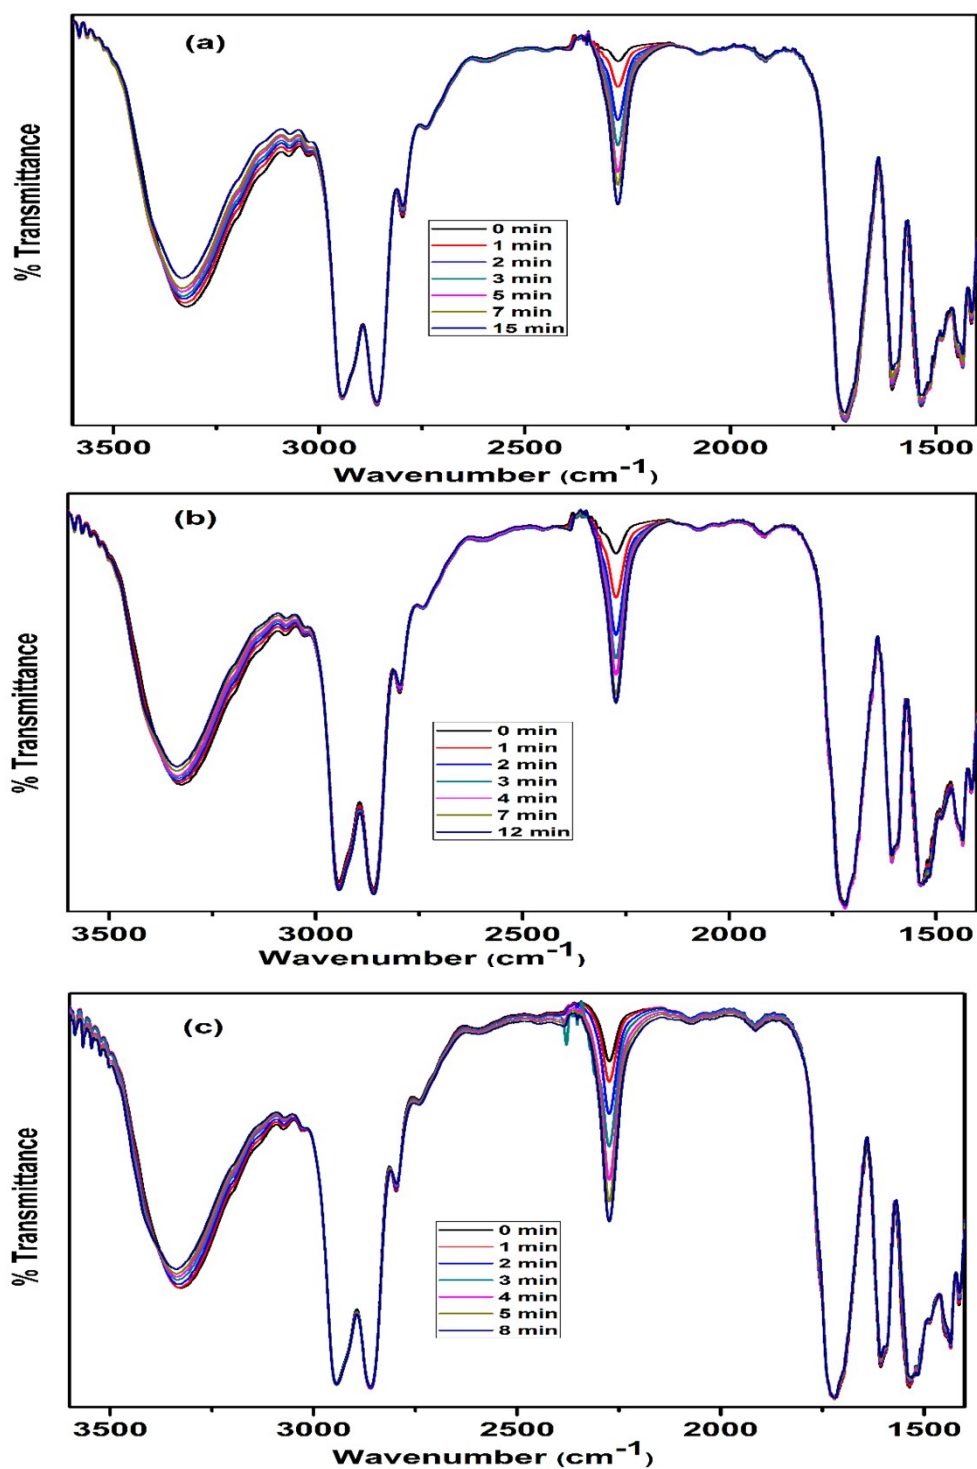

**Figure S38.** FT-IR Spectra recorded for different time intervals at different temperatures for the deblocking reaction of p-esterphenol-blocked polyisocyanate; (a) 120 °C (b) 130 °C and (c) 140 °C.

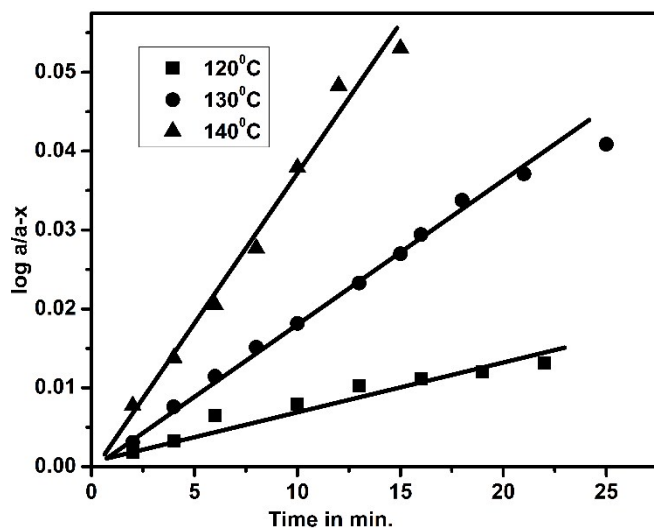

**Figure S39.** Amine-catalysed first-order kinetic plots of deblocking reaction of o-cresol blocked polyisocyanate.

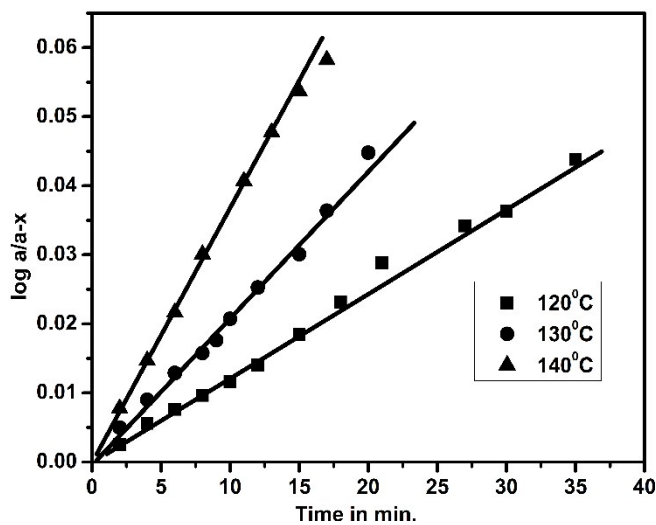

**Figure S40.** Amine-catalysed first-order kinetic plots of deblocking reaction of p-cresol blocked polyisocyanate.

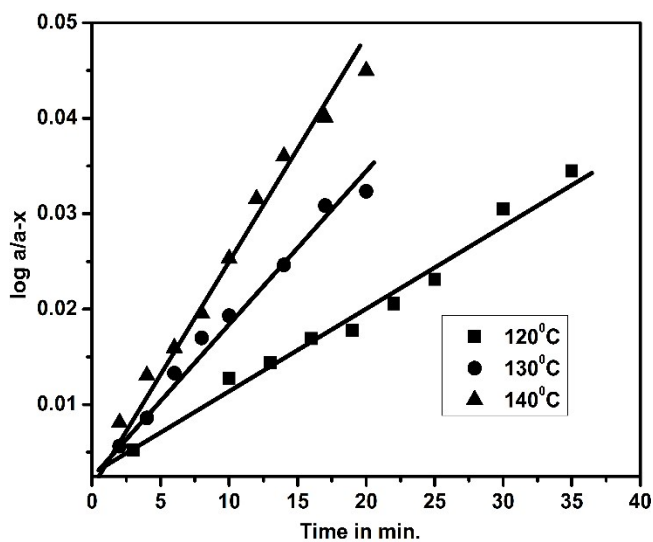

**Figure S41.** Amine-catalysed first-order kinetic plots of deblocking reaction of o-methoxyphenol blocked polyisocyanate.

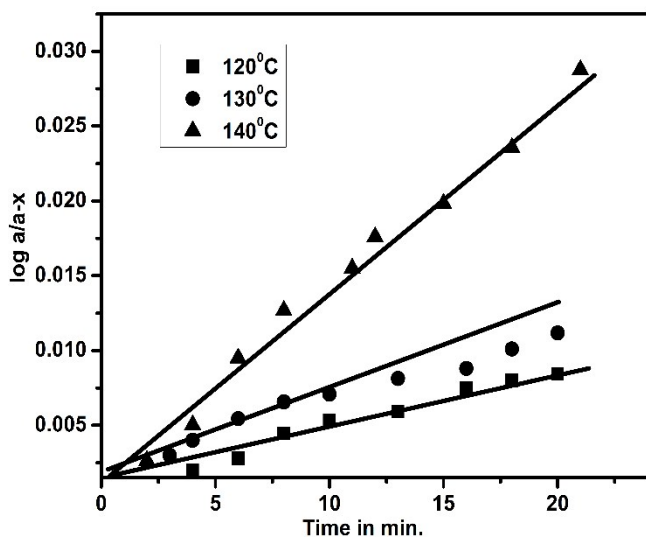

**Figure S42.** Amine-catalysed first-order kinetic plots of deblocking reaction of p-methoxyphenol blocked polyisocyanate.

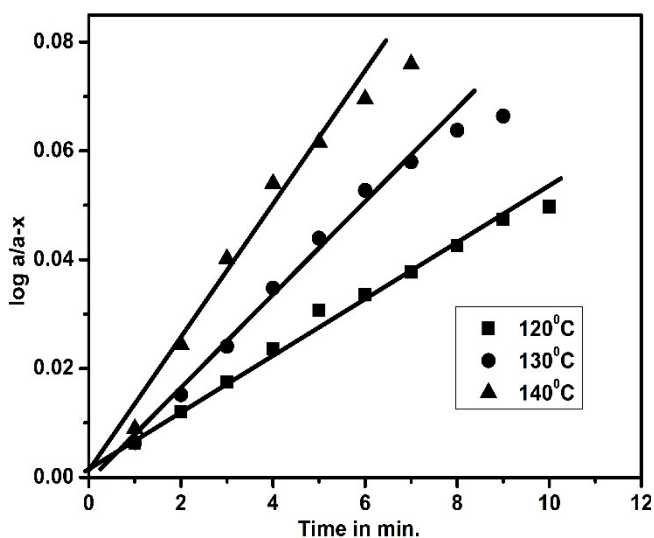

**Figure S43.** Amine-catalysed first-order kinetic plots of deblocking reaction of o-chlorophenol blocked polyisocyanate.

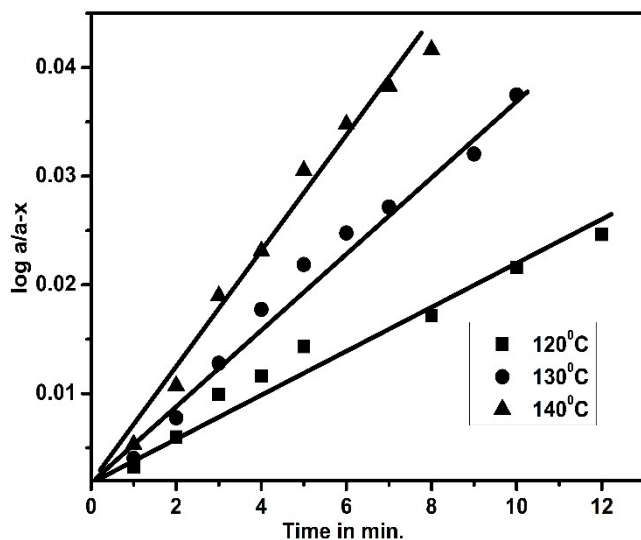

**Figure S44.** Amine-catalysed first-order kinetic plots of deblocking reaction of p-chlorophenol blocked polyisocyanate.



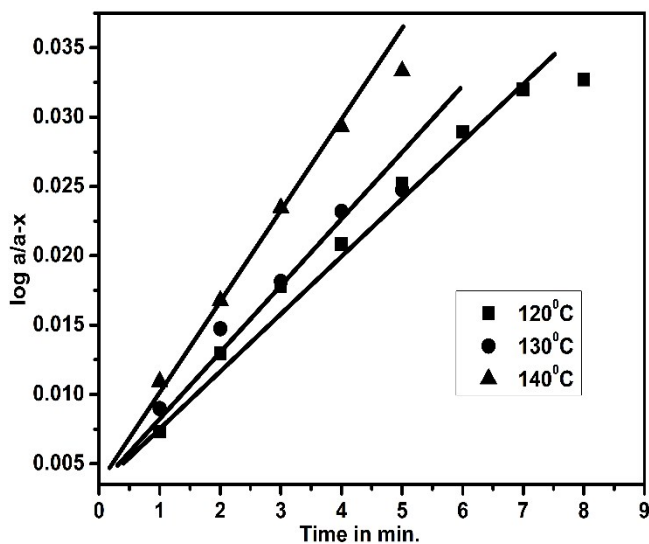

**Figure S45.** Amine-catalysed first-order kinetic plots of deblocking reaction of p-esterphenol blocked polyisocyanate.

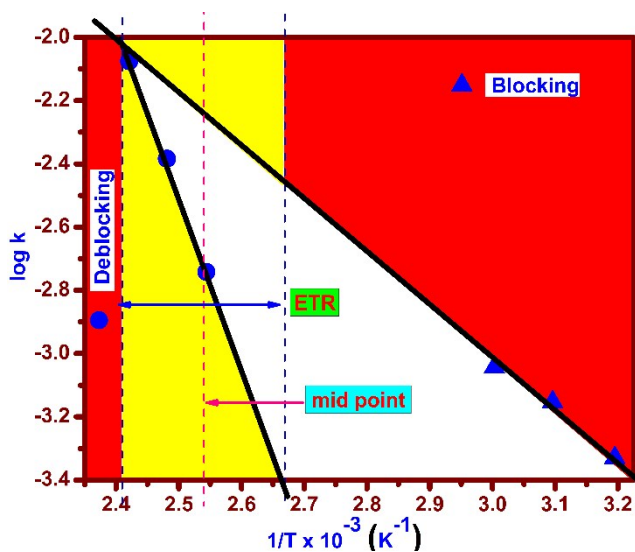

**Figure S46.** Arrhenius plots of forward and reverse reactions of o-cresol-blocked polyisocyanate showing equilibrium temperature range (ETR) and probable equilibrium temperature.

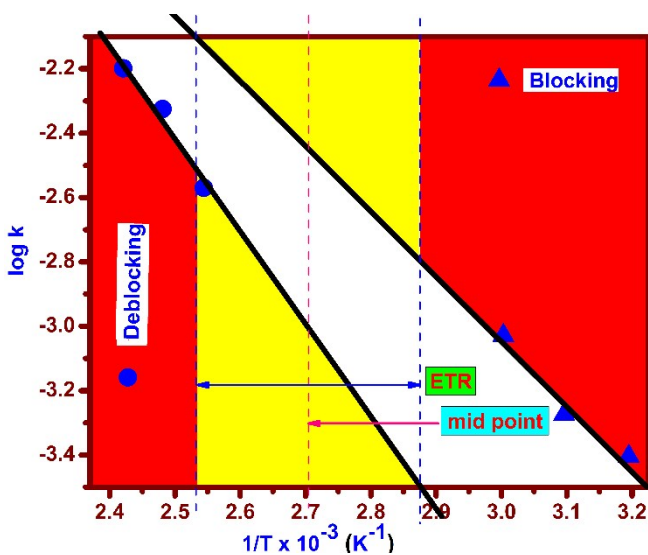

**Figure S47.** Arrhenius plots of forward and reverse reactions of p-cresol-blocked polyisocyanate showing equilibrium temperature range (ETR) and probable equilibrium temperature.

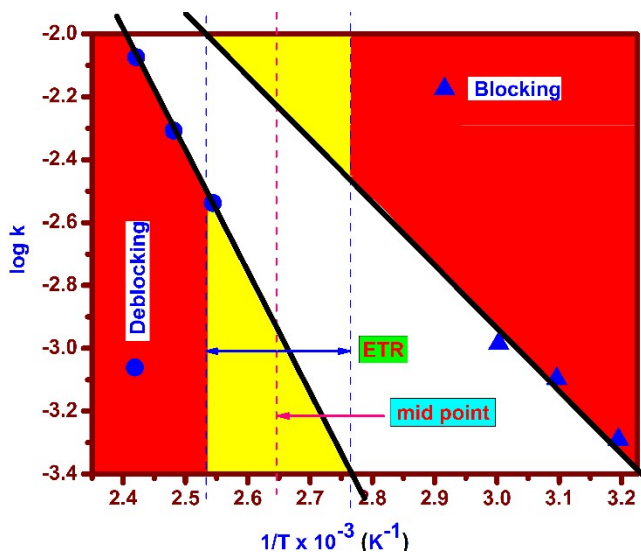

**Figure S48.** Arrhenius plots of forward and reverse reactions of o-Me-phenol-blocked polyisocyanate showing equilibrium temperature range (ETR) and probable equilibrium temperature.

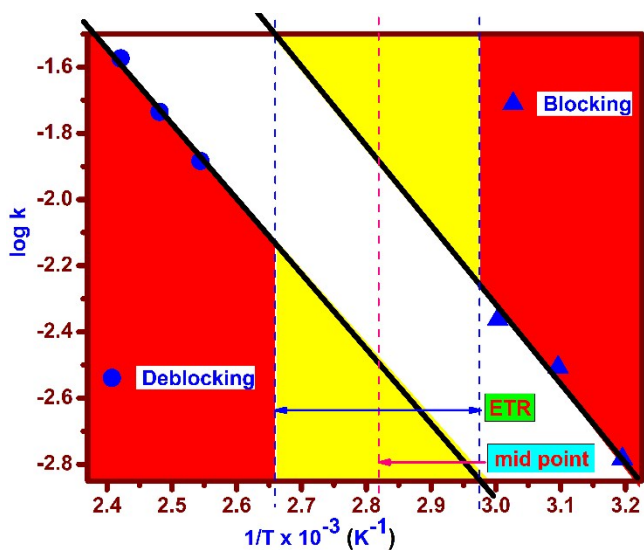

**Figure S49.** Arrhenius plots of forward and reverse reactions of o-Cl-phenol-blocked polyisocyanate showing equilibrium temperature range (ETR) and probable equilibrium temperature.

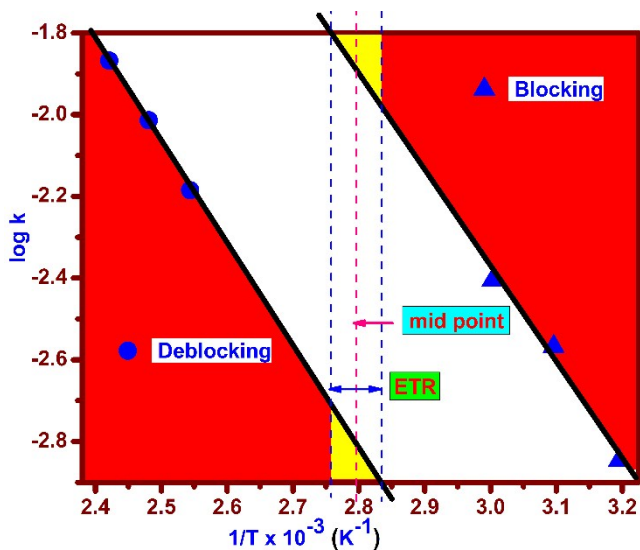

**Figure S50.** Arrhenius plots of forward and reverse reactions of p-Cl-phenol-blocked polyisocyanate showing equilibrium temperature range (ETR) and probable equilibrium temperature.
